## **Accounting for population growth, intermittent breeding, and aging error in close-kin mark-recapture assessments**

John D. Swenson<sup>1</sup>, Elizabeth N. Brooks<sup>2</sup>, Dovi Kacev<sup>3</sup>, Charlotte Boyd<sup>4</sup>, Michael Kinney<sup>5</sup>, Benjamin Marcy-Quay<sup>6</sup>, Anthony Sévêque<sup>7</sup>, Kevin Feldheim<sup>8</sup>, Lisa M. Komoroske<sup>1</sup>

<sup>1</sup> Department of Environmental Conservation, The University of Massachusetts, Amherst, Massachusetts, USA

<sup>2</sup> Population Dynamics Branch, Northeast Fisheries Science Center, National Marine Fisheries Service, National Oceanic and Atmospheric Administration, Woods Hole, Massachusetts, USA

<sup>3</sup> Marine Biology Research Division, Scripps Institute of Oceanography, San Diego, California, USA

<sup>4</sup> IUCN – Americas Office, 1630 Connecticut Ave NW, Washington DC ,USA

<sup>5</sup> Life History Program, Pacific Island Fisheries Science Center, National Marine Fisheries Service, National Oceanic and Atmospheric Administration, Honolulu, Hawaii, USA

<sup>6</sup> Rubenstein Ecosystem Science Laboratory, University of Vermont, Burlington, Vermont, USA

<sup>7</sup> Department of Wildlife, Fisheries and Aquaculture, Forest and Wildlife Research Center, Mississippi State University, Mississippi State, Mississippi, USA

<sup>8</sup> Pritzker Laboratory for Molecular Systematics and Evolution, The Field Museum, Chicago, Illinois, USA

**Abstract:** Obtaining robust estimates of population abundance is a central challenge hindering the conservation and management of many threatened and exploited species. Close-kin mark-recapture (CKMR) is a genetics-based approach that has strong potential to improve monitoring of data-limited species by enabling estimates of abundance, survival, and other parameters for populations that have been challenging to assess. However, CKMR models have received limited sensitivity testing under realistic population dynamics and sampling scenarios, impeding application of the method in population monitoring programs and stock assessments. Here, we use individual-based simulation to examine how unmodeled population dynamics and sampling strategy affect the accuracy and precision of CKMR parameter estimates, and present adapted models that correct the biases that arise from model misspecification. Our results demonstrate that a relatively simple CKMR model produces robust estimates of population abundance when key assumptions including annual breeding and stable population size are met; however, if strong population declines or non-annual breeding dynamics are present, a more complex CKMR model must be constructed to avoid biased parameter estimates. In addition, we show that CKMR can generate reliable abundance estimates for adults from a variety of sampling strategies, including juvenile-focused sampling where adults are never directly observed. Finally, we apply our adapted CKMR model to two decades of genetic data from juvenile lemon sharks (*Negaprion brevirostris*) in Bimini, Bahamas to demonstrate how juvenile-focused CKMR can be used to expand monitoring efforts for highly mobile populations. Overall, this study expands our understanding of the biological factors and sampling decisions that cause bias in CKMR models, and provides recommendations for sampling design and model construction that can aid biologists in planning and implementing an effective CKMR experiment, particularly for long-lived data-limited species.

## 1 **Introduction**

2           Population abundance plays important roles in both fundamental and applied biological  
3 research, and is associated with a wide range of ecological and evolutionary processes, including  
4 predator-prey dynamics (Carbone et al. 2011), competition (Robertson 1996), demographic rates  
5 (Herrando-Pérez et al. 2012), density-dependent population dynamics (Hassell 1975, Berryman  
6 1989), and genetic drift (Ellegren and Galtier 2016). Abundance estimates and trends are also  
7 key metrics for conservation and management, and are commonly used to assess conservation  
8 status (Wilson et al. 2011), quantify the impacts of threats and/or recovery efforts (Jennings  
9 2000, Ward-Paige et al. 2012, Magera et al. 2013), and scale regulated harvest quantities (e.g.  
10 allowable biological catch, annual catch limits) for managed populations of target and non-target  
11 species. Consequently, a wide range of methods have been developed for estimating population  
12 abundance (Schwarz and Seber 1999, Wilson and Delahay 2001, McCauley et al. 2012).

13 Capture-mark-recapture (CMR) is one prominent and widely used method in which abundance is  
14 estimated by constructing capture histories for each sampled (or tagged) individual, estimating  
15 capture probabilities, and comparing the number of recaptured individuals to the total number of  
16 sampled individuals (Cormack 1964, Jolly 1965, Seber 1965). A number of variations of CMR  
17 methods have been developed over the years to account for varied population demographics and  
18 sampling schemes (Pollock 2000, Amstrup et al. 2010), but the approach remains largely  
19 intractable in situations where recapture rates are very low, as with many low density and highly  
20 mobile marine species (Kohler and Turner 2001, Webster et al. 2002, Boyd et al. 2018). Further,  
21 CMR can only directly inform about the sampled demographic, while many highly mobile  
22 marine species have spatially segregated life histories during which they are available for  
23 sampling as juveniles in nearshore habitats before transitioning to a less accessible pelagic

24 habitat as adults. In such cases, CMR results are restricted to providing direct information about  
25 the juvenile portion of the population, while the population dynamics of adults can only be  
26 modeled effectively if additional data are available and if key assumptions are met (Kendall  
27 1999, Pollock 2000). As alternatives to CMR, surveys or transect-based methods can be helpful  
28 tools to estimate regional abundance of species that are consistently available for observation.  
29 However, variability in survey length, uncertainty surrounding the proportion of habitat sampled,  
30 changes in behavior arising from the presence of human observers, and observation error are  
31 common pitfalls that can make such methods unreliable or incomparable across studies  
32 (McCauley et al. 2012, Davis et al. 2022).

33         While CMR, surveys, and transect-based methods can all be useful tools in certain  
34 contexts, applying them in an unbiased way can be prohibitively challenging in many systems.  
35 As such, when estimates of absolute abundance are infeasible, indices of relative abundance are  
36 commonly used to assess populations of exploited species (Campbell 2015). In fisheries, for  
37 example, abundance trends derived from catch and effort data (e.g., catch-per-unit-effort,  
38 CPUE), in concert with biological reference points, can inform management by providing critical  
39 information about whether a population is overfished or if overfishing is actively occurring  
40 (Cortés and Brooks 2018). However, it is extremely challenging to account for all the factors that  
41 could influence catchability (Maunder et al. 2006); hence, indices of relative abundance derived  
42 from CPUE are rarely linearly proportional to actual abundance (Harley et al. 2001, Maunder  
43 and Punt 2004, Lynch et al. 2012), which can result in fundamentally flawed conclusions if  
44 CPUE data are interpreted in isolation, or if linearity between catch rate and abundance is  
45 implicitly assumed (Maunder et al. 2006). Further, producing trends of relative abundance for  
46 highly mobile species frequently requires the integration of multiple independent surveys that

47 suggest differing abundance trends, making it difficult to establish true abundance patterns  
48 (Peterson et al. 2021). All of these issues are amplified in taxa such as elasmobranchs (sharks,  
49 skates, and rays), which are often subject to high levels of illegal, unreported, and unregulated  
50 catch (Cortés and Brooks 2018). While CPUE can provide invaluable information regarding  
51 stock status and harvest pressure when analyzed in the right context (e.g., via an integrated  
52 model with substantial metadata), there is an urgent need for methods that can provide robust  
53 estimates of absolute population abundance and trends when catch data are unreliable or scarce.

54 Close-kin mark-recapture (CKMR) is a genetics-based approach for estimating absolute  
55 population abundance that overcomes many of the logistical challenges inherent to CMR and  
56 other conventional methods of abundance estimation, and it has the potential to greatly improve  
57 monitoring efforts for species that have been difficult to assess (Skaug 2001, Bravington et al.  
58 2016b). In contrast to conventional CMR, the tags in CKMR are genotypes, and animals are  
59 considered “re-captured” when their kin are identified (Bravington et al. 2016b). This removes  
60 the need for individual recapture and allows for the estimation of adult abundance using samples  
61 collected solely from juveniles, as well as samples obtained lethally through fishing or hunting  
62 (Bravington et al. 2016b, Hillary et al. 2018). While CKMR can theoretically leverage any  
63 relationship, the most common applications so far have focused on parent-offspring pairs (POPs)  
64 (Bravington et al. 2016a, Ruzzante et al. 2019, Marcy-Quay et al. 2020) and/or half-sibling pairs  
65 (HSPs) (e.g., Hillary et al. 2018). In cases where sampling is limited to juveniles, CKMR can  
66 provide added value to conventional CMR by generating parameter estimates for the adult  
67 population while CMR estimates parameters for the sampled (in this case juvenile) portion of the  
68 population. Depending on the form of the model, CKMR can estimate additional quantities  
69 including survival (Hillary et al. 2018), fecundity (Bravington et al. 2016b), dispersal (Feutry et

70 al. 2017, Conn et al. 2020, Patterson et al. 2022b), and population growth rate, if sufficient  
71 complementary data are available. These advantages and possibilities make CKMR an exciting  
72 tool to improve monitoring efforts and population assessments for data-limited species of  
73 management and conservation concern.

74         Despite CKMR's strong potential to provide key information for conservation and  
75 management, its implementation has been slowed due to a lack of clarity regarding the flexibility  
76 and limitations of the method. Several studies have discussed factors that are likely to cause bias  
77 if left unaccounted for in CKMR models (Bravington et al. 2016b, Conn et al. 2020, Waples and  
78 Feutry 2021, Trenkel et al. 2022), but there have been few quantitative assessments of the bias  
79 that arises from applying an overly simplistic CKMR model to a population with complex  
80 dynamics (but see Conn et al. 2020, Waples and Feutry 2021). For example, one key assumption  
81 of a simple base-case CKMR model (e.g., Equations 3.3 and 3.10 in Bravington et al. 2016b) is  
82 stable population growth. However, real populations may exhibit significant interannual  
83 fluctuations in population size. If such changes are persistent, or if high levels of mortality are  
84 introduced (e.g., via environmental disaster or heavy fishing pressure), then it may be necessary  
85 to specify a more complex CKMR model that can accommodate a changing population. A  
86 second assumption of a simple base-case CKMR model is annual breeding, yet many long-lived  
87 species exhibit intermittent breeding whereby one or more years elapse between reproductive  
88 events (Shaw and Levin 2013). Systematic intermittent breeding dynamics are expected to cause  
89 bias in CKMR parameter estimates if unaccounted for in the model (Waples and Feutry 2021),  
90 but quantitative data regarding the degree of bias are scarce, as are concrete examples for how to  
91 mitigate the bias. Finally, a core component of CKMR is the use of age data, which is required to  
92 assign individuals to the correct cohort (Bravington et al. 2016b). Direct aging is very

93 challenging for some taxa (Cailliet 2015), and length-based age assignment is prone to bias when  
94 growth curves are based on size-selective sampling, as they often are (Gwinn et al. 2010). While  
95 more advanced statistical methods can account for uncertainty in aging during the modeling  
96 process (Schwarz and Runge 2009), it may also be possible to alleviate bias by targeting  
97 sampling to age classes that can be reliably aged, such as young-of-the-year (YOY) which are  
98 often easily distinguished from other age classes by their small size and/or the presence of  
99 umbilical scars (Feldheim et al. 2002). A better understanding regarding the circumstances in  
100 which a simple base-case CKMR model is liable to produce biased parameter estimates, in  
101 combination with strategies to mitigate that bias, will help ensure robust application of the  
102 method and facilitate its integration into conservation and management frameworks.

103         Elasmobranchs (sharks, skates, and rays) are a group of highly vulnerable marine species  
104 that play key ecological roles as apex- and meso-predators in ecosystems around the world  
105 (Vaudo and Heithaus 2011, Ferretti et al. 2018), and are likely to benefit from future application  
106 of CKMR. Around one-third of the 1200+ elasmobranch species are threatened with extinction,  
107 due primarily to overfishing (Dulvy et al. 2021), while nearly half of elasmobranch species  
108 (46%) are classified by the IUCN as Data Deficient and only a small fraction of exploited  
109 populations are managed sustainably (Kindsvater et al. 2018). Conventional methods for  
110 estimating abundance and mortality are intractable for many elasmobranch populations because  
111 individual recapture rates for highly mobile elasmobranch species can be very low (Kohler and  
112 Turner 2001), and it can be logistically challenging to physically capture and mark larger species  
113 (Guttridge et al. 2017). In contrast to conventional methods, CKMR requires only small tissue  
114 samples that can be obtained from adults via biopsy or from juveniles that are easier to handle  
115 than their adult counterparts - without need for individual recapture - making this a more

116 tractable approach for many elasmobranch populations. CKMR has added potential for  
117 elasmobranchs because the life histories of many species allow for the use of juvenile-only  
118 CKMR models (e.g., half-sibling (HS) CKMR) that can estimate adult abundance without  
119 sampling a single adult (Bravington et al. 2016b), and many migratory elasmobranchs utilize  
120 nursery areas where juveniles are readily available for sampling (Heupel et al. 2007).  
121 Accordingly, CKMR has been applied to several elasmobranch populations to date (Bradford et  
122 al. 2018, Hillary et al. 2018, Bravington et al. 2019, Delaval et al. 2022, Trenkel et al. 2022,  
123 Patterson et al. 2022b) and is likely to be an important tool to inform elasmobranch conservation  
124 and management in the future. However, elasmobranchs are susceptible to steep population  
125 declines (Ferretti et al. 2018), commonly exhibit multiennial breeding cycles (Nosal et al. 2021),  
126 and are exceptionally challenging to age (Cailliet 2015), and we do not know how much bias can  
127 accrue when such factors are unaccounted for in CKMR models. As such, there is a risk that  
128 biased parameter estimates from CKMR will unwittingly be incorporated into management  
129 frameworks for elasmobranchs, leading to incorrect management actions that ultimately threaten  
130 their populations.

131         To facilitate the robust application of CKMR to elasmobranchs and other taxa facing  
132 similar challenges with abundance estimation, we investigated the sensitivity of CKMR to  
133 unmodeled dynamics related to population growth and breeding schedule, as well as uncertainty  
134 in age assignment. We used stochastic individual-based simulation to generate distinct  
135 populations of lemon sharks (*Negaprion brevirostris*) under different population dynamics  
136 scenarios and sampled each population using sampling schemes that targeted different age  
137 classes. Two different CKMR models were fit to each dataset: one that was naïve to at least one  
138 component of the data-generating model (naïve model) and one that was adapted to account for



139 all relevant population dynamics (adapted model). We compared the bias in parameter estimates  
140 from both models (naïve vs adapted) and across all sampling schemes, including one in which  
141 age data were unreliable. Finally, we applied a model that was adapted for population growth  
142 and multiennial breeding to two decades of real genetic data from lemon sharks in Bimini,  
143 Bahamas to generate a time-series of abundance estimates for the breeding population of  
144 females. Collectively, these results provide important insights into the ways in which unmodeled  
145 population dynamics, sampling selectivity, and aging error affect CKMR model performance,  
146 while also offering guidance regarding sampling design and model construction.

147

## 148 **2. Methods**

149 Our simulation framework comprised four primary components: 1) an individual-based  
150 population simulation that stochastically generated distinct populations with known parameters,  
151 2) selective sampling of age classes from those populations, 3) construction of a pairwise  
152 comparison matrix from the samples, and 4) a CKMR model that was fit to the pairwise  
153 comparison matrix to estimate the known population parameters. The first two components  
154 comprised our data-generating model (DGM) while the latter two formed our estimation model  
155 (Figure 1).

156 We then tested the interplay of population dynamics and model complexity by iteratively  
157 varying a subset of population parameters (Table 1) and fitting two CKMR models to the data:  
158 one that was naïve to the added dynamics, and one that was adapted to account for them. Each  
159 scenario was repeated 500 times, with each iteration producing a population with a distinct  
160 pedigree and parameter estimates.

161

### 162 **2.1 Data generating model**

163 Parameters governing our individual-based population simulations were designed to  
164 replicate the life history traits of lemon sharks, beginning with an adult population size of 1000  
165 in year 1 (Appendix S1: Table S1). We allowed females to breed with up to three males each  
166 breeding cycle, which is typical for this species (Feldheim et al. 2004), and set no limit on the  
167 number of females a male could breed with. Survival was assumed constant within each of three  
168 life stages, which we designated as young-of-year (age 0), juvenile (age 1-11) and adult (age 12-  
169 50). We assigned knife-edged maturity, so every individual age 12 and over was available for  
170 breeding, while no individuals younger than age 12 were allowed to breed. After maturity,  
171 fecundity was age-invariant, with the mean offspring produced per female per breeding event  
172 varying with the breeding cycle to keep population growth approximately stable except for  
173 simulations where we explicitly tested population change (Table 1: Scenarios 2.1-2.3).

#### 174 2.1.1 Population growth

175 We varied population growth in our DGM in two ways depending on our desired  
176 magnitude of change in population growth rate. First, to examine whether CKMR parameter  
177 estimates were affected by population trends, we reduced or increased annual female fecundity  
178 by 0.5 for the last 50 years of the 90-year simulation (Scenarios 2.1 and 2.2), which resulted in a  
179 population that declined or grew by an average of 1% per year over this time period. To achieve  
180 more substantial declines in population size (~7%; Scenario 2.3), we stochastically imposed 5-  
181 10% additional mortality into the simulation for juvenile and adult age classes over the last 10  
182 years of the simulation.

#### 183 2.1.2 Intermittent breeding

184 Many elasmobranchs systematically breed on multiennial cycles (Feldheim et al. 2002,  
185 2017, Nosal et al. 2021), which violates the assumption of annual breeding in a simple base-case  
186 CKMR model. To examine the bias that accrues when this trait is unaccounted for in a CKMR  
187 model, we ran simulations where 50%, 75%, 90% or 100% of females bred on a two-year cycle,  
188 and the rest bred on an annual cycle, analogous to the mixed mating periodicity observed in the  
189 finetooth shark (*Carcharhinus isodon*) in the Northern Gulf of Mexico (Higgs et al. 2020). Each  
190 female in our simulation was assigned an annual or biennial breeding cycle at birth; the biennial  
191 breeders were then randomly assigned to breed on odd or even years once they reached maturity.  
192 This resulted in a population where half of the biennially breeding females reproduced for the  
193 first time in the year they matured (age 12) and the other half reproduced for the first time the  
194 following year (age 13). Mature males were assumed available to breed every year once they  
195 reached maturity. Because some elasmobranchs breed on tri-ennial cycles, we also ran a  
196 simulation where 100% of females bred on a three year cycle, while males, again, were assumed  
197 available to breed each year. Finally, we added a degree of stochasticity and examined a scenario  
198 where females generally bred on a biennial schedule, but 10% of off-cycle breeders gave birth  
199 each year while 10% of on-cycle breeders failed to breed each year.

## 200 2.2 Sampling

201 All simulated populations were sampled using three different schemes that selected for  
202 different age classes: the first drew samples exclusively from young-of-year (age 0) individuals;  
203 the second made juveniles of all ages except young-of-year (ages 1-11) available to sample; and  
204 the third allowed sampling of all age classes (ages 0-50). These scenarios were chosen to  
205 replicate potential sampling scenarios for elasmobranchs such as in nursery areas (Feldheim et al.

206 2002, Heupel et al. 2007), juvenile aggregation sites (Rowat et al. 2007, Jacoby et al. 2012), and  
207 resident populations (Snelson and Williams 1981), respectively.

208 In each case, the population was initially sampled at four different intensities representing  
209 0.5%, 1%, 1.5%, and 2% of the population. Samples were drawn annually for four years at the  
210 end of the population simulation (i.e. years 87 – 90), following reproduction but before mortality  
211 each year. Sampling 1.5% of the population resulted in an average of 615 total samples and 100-  
212 200 half-sibling pairs (HSPs), which is expected to produce a reasonable CV for all sampling  
213 schemes (Bravington et al. 2016b). Therefore, following model validation, we focused on  
214 sampling 1.5% of the population for the remainder of our simulations.

#### 215 2.2.1 Aging uncertainty

216 A crucial component of CKMR is accurate aging, yet some taxa, including  
217 elasmobranchs, are notoriously difficult to age, with most efforts relying on length-at-age growth  
218 curves to assign age to sampled individuals (Cailliet 2015). To examine how imprecision in  
219 growth curves affects CKMR parameter estimates, we first constructed an age-length key for  
220 lemon sharks using data from a long-term study of the population in Bimini, Bahamas (Feldheim  
221 et al., 2014), and calculated the standard deviation of lengths for individuals with known ages,  
222 the majority of which (>95%) spanned ages 0-3. We then simulated lengths for each sampled  
223 individual (which were assigned ages in our DGM) using a Von Bertalanffy growth curve for the  
224 species (Brown and Gruber 1988). Each individual was assigned a length by drawing a value  
225 from a normal distribution with the mean length-at-age specified by the Von Bertalanffy curve,  
226 and the standard deviation derived empirically from our age-length key for individuals aged 0-2,  
227 and arbitrarily from a CV of 5%, 10%, or 20% for individuals aged 3+. After assigning lengths to  
228 each individual, we used a reverse Von Bertalanffy growth curve with the same values for  $t_0$  (-

229 2.302),  $L_{inf}$  (317.65), and  $K$  (0.057) to re-assign ages to sampled individuals based on their  
230 lengths, rounding to the nearest integer, thus giving plausible, yet sometimes incorrect, ages  
231 (similar to age-slicing; see Ailloud et al. 2015, e.g.). These re-assigned ages were then used to  
232 construct the pairwise comparison matrix that was input to the CKMR model.

### 233 2.3 Pairwise comparison matrix

234 CKMR produces estimates of abundance and other population parameters by defining  
235 kinship probabilities for every pair of sampled individuals given relevant covariates (e.g., age,  
236 sex). We constructed two standard pairwise comparison matrices for each set of samples. The  
237 first matrix contained positive and negative kinship assignments for half-siblings. To satisfy the  
238 assumption of independent sampling, whenever full siblings or self-recaptures were present, all  
239 but one individual/instance was removed prior to construction of the matrix. Once the matrix was  
240 created, same-cohort comparisons were removed, as these can complicate analyses considerably  
241 (Bravington et al. 2016b, Førlund 2019). Kinship assignment in our simulations was known  
242 without error, so each comparison was assigned as a positive if the two individuals being  
243 compared were a half-sibling pair, and negative if not.

244 The second matrix was composed of parent-offspring (PO) comparisons. Our simulations  
245 included sampling over four years only, so the PO matrix was only relevant to the scenario that  
246 included sampling of adults. For each birth year represented in the data (a.k.a. reference year),  
247 individuals that were alive in that year were split into potential offspring or parents based on  
248 whether they were born in that year (potential offspring), reproductively mature at the time  
249 (potential parent), or neither, in which case they were left out of the matrix corresponding to that  
250 year. A separate pairwise comparison matrix was constructed for each reference year that

251 compared all potential parents to all potential offspring in that year, and each comparison was  
252 assigned as a positive or negative.

253         Once the appropriate half-sibling and parent-offspring comparisons were defined for each  
254 reference year, all matrices were collated and grouped by 1) type of relationship (half-sibling or  
255 parent-offspring), 2) reference year (a.k.a. birth year of younger individual for half-sibling  
256 comparisons, or birth year of the offspring for parent-offspring comparisons), 3) reference year  
257 gap (difference between the reference year and the estimation year when specifying a population  
258 growth model; see Section 2.4.2 below), and 4) mortality year gap (difference between the birth  
259 years of the individuals being compared; see Eq. 1), as applicable. Each row was treated as a  
260 binomially distributed random variable in the CKMR model, with the probability of success  
261 defined by Equations 1-4 below, and  $n$  equal to the total number of comparisons in each group  
262 (see Appendix S1: S1.1 and Table S2 for more details).

## 263 2.4 Estimation models

264         Kinship probabilities for each pairwise comparison in CKMR are derived from the  
265 expected reproductive output of individual animals (defined by covariates such as age and sex)  
266 relative to the total reproductive output of the population in the specified reference year  
267 (Bravington et al. 2016b). The specific equations we used to define kinship probabilities in our  
268 CKMR models varied with the scenarios we tested, with each scenario comparing a “naïve”  
269 model to an “adapted” model, where the naïve model ignored one key dynamic of the simulated  
270 population and the adapted model accounted for it. All of our equations are based on the general  
271 equations defined in Bravington et. al. (2016b).

### 272 2.4.1 Base-case CKMR model

273 Let  $Y\{K_{i,j} = MHSP\}$  be the probability that individuals  $i$  and  $j$  are a maternal half-sibling  
274 pair (i.e. they share a mother but not a father). Probabilities for  $Y$  depend on the likelihood that  
275 the same individual that birthed the older offspring ( $i$ ) survived and gave birth to the younger  
276 offspring ( $j$ ). If we assume that all animals of reproductive age in the population during  $i$  and  $j$ 's  
277 birth years are equally likely to have birthed each of them, and if we only include as potential  
278 parents the animals that were of reproductive age during the birth years of  $i$  and  $j$ , then the  
279 probability of kinship ( $K$ ) can be defined as

$$280 \quad Y\{K_{i,j} = MHSP\} \sim \text{Binomial}\left(\frac{\phi^\delta}{N_{\varphi(y_j)}}, R_{(y_i, y_j)}\right) \quad (1),$$

281 where,

282  $\phi$  is the annual survival probability for adults,

283  $y_j$  is the birth year of individual  $j$  (the younger sibling),

284  $\delta$  is the number of years between the birth years of individuals  $i$  and  $j$  (i.e.  $y_j - y_i$ ) during  
285 which any potential parent of  $i$  may have died a.k.a. the “mortality year gap”,

286  $R_{(y_i, y_j)}$  reflects the total number of pairwise comparisons between individuals born in  
287 years  $y_i$  and  $y_j$ , and

288  $N_{\varphi(y_j)}$  is the total number of mature females in year  $y_j$ .

289

290 Notably,  $K$  can be generalized to refer to either half-sibling (HS) or parent-offspring (PO)  
291 relationships by re-interpreting the parameter  $\delta$ , which for HS relationships refers to the  
292 difference between cohort birth years, but for PO kinship refers to the difference between the  
293 birth year of the offspring and the capture year of the adult. In the latter scenario, if the parent  
294 was captured in or after the offspring's birth year, whether sampling was lethal or non-lethal,

295 then we know that the parent was alive in the year the offspring was born. Thus, any value for  $\delta$   
296 which is  $\leq 0$  (which would reflect a parent that is captured in or after the year the offspring was  
297 born) is assigned a value of 0 and  $\phi^\delta$  reduces to 1. Thus,

$$298 \quad Y\{K_{i,j} = \text{MHSP or MPOP}\} \sim \text{Binomial} \left( \begin{array}{ll} \frac{1}{N_{\varphi(y_j)}} \phi^\delta, R_{(y_i, y_j)} & \delta > 0 \\ \frac{1}{N_{\varphi(y_j)}}, R_{(y_i, y_j)} & \delta \leq 0 \end{array} \right) \quad (2).$$

299 Equation 2 defines our simple base-case CKMR model. Though the model focuses on  
300 maternal kinship, the same probabilities also apply to males. POPs were only included in the  
301 likelihood for the sampling scheme in which adults were sampled with all other age classes;  
302 otherwise, the likelihood included HS probabilities only.

303

#### 304 2.4.2 Population growth model

305 To account for population growth/decline in our CKMR model, we chose a simple  
306 exponential growth model to describe the population dynamics and added the parameter  $\lambda$  to our  
307 model. As such, our adapted model that accounts for population growth is:

$$308 \quad Y\{K_{i,j} = \text{MHSP or MPOP}\} \sim \text{Binomial} \left( \begin{array}{ll} \frac{1}{N_{\varphi(y_j)} \lambda^{(y_j - \gamma)}} \phi^\delta, R_{(y_i, y_j)} & \delta > 0 \\ \frac{1}{N_{\varphi(y_j)} \lambda^{(y_j - \gamma)}}, R_{(y_i, y_j)} & \delta \leq 0 \end{array} \right) \quad (3),$$

309

310 where  $\lambda$  defines the annual population growth rate,  $\gamma$  represents the estimation year (a.k.a. the  
311 year to which the abundance estimate is targeted), and  $(y_j - \gamma)$  is the reference year gap (see  
312 Appendix S1: S1.2). To assess the degree to which the choice of estimation year affects model  
313 performance, our simulations included an evaluation of model performance for three different  
314 estimation years ( $\gamma$ ): 10 years in the past, 5 years in the past, and the present year (i.e. the last  
315 year of the simulation), while all other dimensions were held constant.



### 316 2.4.3 Intermittent breeding model

317 If a population – or subset of a population – systematically breeds on a non-annual  
318 schedule, then CKMR estimates will be biased unless this behavior is accounted for in the model  
319 (Waples and Feutry 2021). We accounted for intermittent breeding dynamics in our CKMR  
320 model via the inclusion of parameters  $a$  and  $\Psi$ , where  $a$  refers to the number of years between  
321 breeding (e.g., 2 for biennial breeders), and  $\Psi$  is the proportion of individuals that breed every  $a$   
322 years (similar to [Patterson et al. 2022a](#)). This implies that  $(1 - \Psi)$  individuals breed annually. Of  
323 the non-annual breeders, we assume that  $1/a$  breed in a given year. Thus, the effective number of  
324 female breeders in a given year is given by  $(1 - \psi)N_{\varphi} + \frac{\psi}{a}N_{\varphi}$ , and the probability of maternal  
325 half-sibling kinship is

$$326 \quad Y\{K_{i,j} = MHSP\} \sim \text{Binomial}\left(\frac{a\phi^{\delta}}{(a+\psi-\alpha\psi)N_{\varphi(y)}\lambda^{(j-\gamma)}}, R_{i,j}\right) \quad (4).$$

327 As part of Objective 3 of our simulations, we fixed the parameter  $a$  to 2 to reflect biennial  
328 breeding, and explored the ability of our model to estimate  $\Psi$ . If 100% of females breed on a  
329 biennial cycle (i.e.  $a = 2$  and  $\Psi = 1$ ), then the probability of finding half-siblings that are  
330 separated by an odd number of birth years is 0. It is the presence of  $\delta$  intervals that are not  
331 divisible by  $a$  that provide information on the parameter  $\Psi$  (see Appendix S1: S1.3).

332 In our simulations we assumed that intermittent breeding dynamics were only present for  
333 females, and that all males in the population were available for breeding each year; as such,  
334 Equation 4 only applied to maternal comparisons, while Equation 3 was still used for the males.  
335 Finally, because the parent is directly sampled in PO CKMR, there is no need to explicitly  
336 account for breeding periodicity in the likelihood; therefore, we continued to use Equation 3 for  
337 maternal PO comparisons when applicable.

#### 338 2.4.4 Estimation framework

339 We adopted a Bayesian approach to CKMR parameter estimation, which allows for the  
340 incorporation of auxiliary data and/or expert knowledge as priors on model parameters (Kéry and  
341 Schaub, 2012b). For model validation, survival ( $\Phi$ ) was given an informed beta prior which was  
342 derived by solving for  $\alpha$  and  $\beta$  using the equations:  $\mu = \frac{\alpha}{\alpha + \beta}$  and  $\sigma^2 = \frac{\alpha\beta}{(\alpha + \beta)^2(\alpha + \beta + 1)}$ , where  $\mu$   
343 was set to the mean adult survival in the DGM (0.825) and  $\sigma^2$  was calculated from a CV of 5%.  
344 For the rest of the scenarios, survival and other parameters were assigned diffuse priors to reflect  
345 data-limited situations (Table 2).

346 The posterior distributions for parameter estimates were approximated using Markov  
347 Chain Monte Carlo (MCMC) sampling, implemented using the software JAGS (Plummer, 2003)  
348 and applied in the *R* environment (Denwood, 2016; *R* Core Team, 2021). We ran two Markov  
349 chains with a thinning rate of 20, drawing 40,000 samples from the posterior distribution  
350 following a burn-in of 50,000 samples. These settings were empirically derived by assessing  
351 autocorrelation among successive draws and convergence among the chains. We assessed  
352 convergence of the final Markov chains with trace plots and the Gelman-Rubin statistic (Gelman  
353 and Rubin, 1992), and removed from further analysis any iteration with an *Rhat* value  $> 1.01$ ,  
354 although these instances were rare.

#### 355 2.5 Application to Lemon sharks

356 A long-term genetic dataset from lemon sharks in Bimini, Bahamas was used to illustrate  
357 application of our multiennial CKMR model (Eq. 4) to a dataset derived entirely from juvenile  
358 tissue samples (Feldheim et al. 2014). Lemon sharks are large viviparous (live-bearing)  
359 elasmobranchs that reach sexual maturity at approximately 12 years of age (Brown and Gruber  
360 1988) with a lifespan exceeding 30 years (Brooks et al. 2016). Female lemon sharks at Bimini

361 are regionally philopatric and return to Bimini to pup on a biennial schedule, while the males  
362 with which they mate likely reproduce over a much larger area (Feldheim et al. 2002). Juveniles  
363 use the shallow waters surrounding Bimini as a nursery and remain in the area until 2-3 years of  
364 age or until they reach 90 cm in length (Morrissey and Gruber 1993) and generally do not move  
365 between the North and South Islands (Gruber et al 2001). The Bimini nursery contributes to a  
366 larger Western Atlantic population that is classified as Vulnerable by the IUCN (Hansell et al.  
367 2018, 2021, Carlson et al. 2021). The Bimini nursery has been intensively studied since 1995,  
368 with an estimated 99% of newborn sharks sampled at the Bimini North Island each year  
369 (Dibattista et. al. 2007) and maternal kinship assigned for the majority of sampled individuals  
370 (Feldheim et al. 2002, 2004, 2014).

371 For CKMR abundance estimation, we focused on samples collected from the North  
372 Island, which represents a small isolated nursery for lemon sharks aged 0-3 years old (Chapman  
373 et al. 2009), collected from 1993-2015. Most individuals in our dataset were sampled as YOY  
374 and easily identified by the presence of umbilical scars, so their ages were known. Maternal  
375 kinship was assigned with high confidence, but paternal kinship was not, so we focused our  
376 efforts on maternal comparisons only. We estimated abundance as a derived quantity in our  
377 CKMR model by dividing  $N_{q(yj)}$  by  $a$ , which we fixed to 2 for this population that primarily  
378 breeds biennially. Thus, our scope of inference for parameter estimation encompassed the adult  
379 females that visited the North Island nursery to give birth during each year of estimation, a  
380 number which is likely very small (White et al. 2014). We excluded from analysis sampled  
381 individuals without a known birth year as well as same-cohort comparisons (Bravington et al.  
382 2016b), and any individuals for which maternal kinship assignment was uncertain. Since 92% of  
383 individuals were sampled as YOY, our likelihood utilized HSPs only (Eq. 4).

384 To replicate the type of outcome that could be produced by integrating CKMR into long-term  
385 monitoring efforts, we subset the dataset to generate a separate abundance estimate for each year  
386 from 1997 – 2015. Though our dataset includes samples from as far back as 1993, intensive  
387 sampling of the population began in 1995 (Dibattista et al. 2007) and lemon sharks breed  
388 biennially; therefore, we used 1997 as our first estimation year (i.e. one full breeding cycle after  
389 exhaustive sampling began). To generate an abundance estimate for 1997, we included samples  
390 collected from 1993-1997 only, and specified 1997 as our estimation year in the model. For  
391 1998, we added samples collected from 1998 to those collected from the years prior, specified  
392 1998 as the estimation year, and fit another CKMR model, repeating this process through 2015.  
393 We used our simulation results from the targeted sampling of YOY with no aging error to guide  
394 our expectations for the first few years of application when relatively few cohorts were included,  
395 but we expected our results to better align with the sampling scheme that included all juveniles  
396 (again with no aging error) as we increased the number of cohorts included in the dataset.

397 Recognizing that the Bimini lemon shark dataset is unique in how thoroughly the population  
398 was sampled, we also examined whether the model performed similarly with sparser datasets.  
399 First, we applied the same iterative process as with the full dataset and generated a time-series of  
400 abundance estimates, but this time the number of samples collected each year was randomly cut  
401 to 30% of the full dataset. Finally, we generated a third time-series of abundance estimates  
402 wherein we subsampled the full dataset for five-year intervals to examine whether we recovered  
403 similar estimates and trends with datasets that span smaller time series.

404

### 405 **3. Results**

#### 406 3.1 Model validation

407           When the assumptions of the model were met, a simple base-case CKMR model (Eq. 2)  
408 generally produced unbiased estimates of abundance under all sampling schemes and intensities  
409 (Figure 2a), with increasing precision as sampling intensity increased (Figure 2b). The model  
410 produced unbiased estimates of abundance whether the likelihood included HSPs only (as in the  
411 sample all juveniles and target YOY scenarios) or jointly considered HSPs and POPs (as in the  
412 sample all ages scenario), though we note improved precision for the latter. At very low  
413 sampling intensities (0.5% of the target population sampled), fewer than 25 HSPs were identified  
414 for all sampling schemes (Figure 2c) and fewer than 5 parent-offspring pairs (POPs) were  
415 identified for the sampling scheme that included all ages (Figure 2d). In contrast, when 2% of the  
416 population was sampled, over 200 HSPs were identified on average for all sampling schemes,  
417 while 10-40 POPs were identified for the scenario in which all age classes were sampled. These  
418 results demonstrate that a simple base-case CKMR model can produce unbiased abundance  
419 estimates across a range of potential sampling scenarios when population dynamics align with  
420 the model's assumptions.

421

## 422 3.2 Population growth

### 423 3.2.1 Naïve vs adapted model

424           When the simulated population had a trend of consistent growth or decline (+/- 1% per  
425 year), our simple base-case CKMR model that was naïve to annual population fluctuations  
426 performed almost identically to an adapted model with a narrow prior on  $\lambda$  (Eq. 3; Figure 3a-c).  
427 However, when we added mortality to the last ten years of the DGM to simulate a period of  
428 severe population decline, we observed considerable differences in performance depending on  
429 whether the naïve or adapted model was used, and whether the prior on  $\lambda$  was wide enough to

430 encompass the true value (Figure 3d). These results indicate that a naive CKMR model is robust  
431 to minimal increasing or decreasing population trends, but must be adapted if the data span a  
432 period of substantial population change.

433         Using the adapted model (Eq. 3), we also tested the impact of prior specification on  $\lambda$ .  
434 When the simulated population exhibited a trend that was stable, slightly increasing, or slightly  
435 declining (+/-1% per year), abundance estimates were mostly unbiased whether  $\lambda$  was given a  
436 narrow (yellow) or diffuse (blue) prior, as long as a range of age classes were sampled (Figure  
437 3a-c, left two columns). When the population experienced a 10-year period of severe decline, a  
438 diffuse prior that encompassed the realized range of  $\lambda$  values (mean population  $\lambda = 0.93$ ) was  
439 necessary to produce unbiased estimates on average (Figure 3d, left two columns). If sampling  
440 included YOY only, then giving a diffuse prior to  $\lambda$  resulted in poor model performance even  
441 when the population was stable, while the naïve model and the adapted model with the narrow  
442 prior on  $\lambda$  performed similarly to one another, giving reasonable abundance estimates when  
443 population change was minimal but producing biased abundance estimates when population  
444 decline was severe (Figure 3a-d, right column). Taken together, these results suggest that  
445 specification of a prior for  $\lambda$  can improve model performance considerably, especially under  
446 scenarios of severe population decline or when limited age classes are sampled.

447

### 448 3.2.2 Estimation of $\lambda$ and survival

449         Estimates of  $\lambda$  exhibited slight bias that varied with the estimation year. The bias was  
450 generally small as long as sampling included multiple age classes, with targeted sampling of  
451 YOY producing less consistent results (Appendix S1: Figure S1). Estimates of survival were  
452 accurate regardless of estimation year; however, there were differences in bias correlated with

453 sampling scheme, with targeted sampling of YOY again performing worse than when a greater  
454 array of cohorts were represented in the data (Appendix S1: Figure S1).

455 For cases where  $\lambda$  was given a diffuse prior, we tallied how often the model correctly  
456 identified a positive or negative population trend, regardless of the amount of bias surrounding  
457 the estimate of  $\lambda$ . When population change was slight in either the positive or negative direction,  
458 the model was able to correctly identify the trend (positive or negative) 57% - 66% of the time,  
459 depending on sampling scheme and estimation year (Appendix S1: Figure S2a.). When  
460 population decline was severe, the model was able to accurately determine the direction of  
461 population change in nearly all cases regardless of sampling scheme (Appendix S1: Figure S2b),  
462 though we noted a slight decline in this capacity as the estimation year was projected closer to  
463 the present.

464

### 465 3.2.3 Impact of estimation year

466 All combinations of sampling scheme and CKMR model performed progressively worse  
467 as the year of estimation was projected farther into the past, a trend that was reflected in  
468 estimates of abundance (Figure 3) and  $\lambda$  (Appendix S1: Figure S1, left), but not survival  
469 (Appendix S1: Figure S1, right). These results suggest that when population size cannot be  
470 assumed constant, the choice of estimation year can have a strong effect on CKMR parameter  
471 estimates.

472

## 473 3.3 Intermittent breeding

### 474 3.3.1 Naïve vs adapted model

475           When a CKMR model that is naïve to intermittent breeding (Eq. 3) was applied to data  
476 from a population with females that bred biennially, the resulting parameter estimates were  
477 substantially more biased than those generated by a model that was adapted to account for  
478 intermittent breeding (Eq. 4). In particular, estimates of abundance (Figure 4a) and survival  
479 (Appendix S1: Figure S3a) were strongly influenced by the choice of model, while estimates of  $\lambda$   
480 were less affected (Appendix S1: Figure S3b). These results confirm the importance of  
481 accounting for multiennial breeding dynamics in a CKMR model.

### 482 3.3.2 Variations in breeding schedule

483           When we included a proportion of biennial breeders that stochastically bred off-cycle  
484 (Table 1; Scenario 3.6), or when the population comprised a mix of annual and biennial breeders  
485 (i.e.  $\Psi < 1$ ), estimates of abundance from the multiennial model remained unbiased for both  
486 females and males, though we note a slight tendency for the model to underestimate female  
487 abundance when there is a high percentage of annual breeders (Figure 4a, Table 3). For the  
488 scenarios that sampled across a broad range of cohorts, survival estimates from the multiennial  
489 model were unbiased on average regardless of the proportion of annual breeders included in the  
490 simulation (Appendix S1: Figure S3a). As the ratio of biennial to annual breeders was shifted  
491 towards annual breeders (i.e. as  $\Psi$  was made smaller in the DGM), the performance gap between  
492 the naïve (annual) and adapted (multiennial) model diminished for all parameters and sampling  
493 schemes.

494           Estimates of  $\Psi$  were unbiased when the population comprised a high proportion of  
495 intermittent breeders that reliably bred on-cycle, but became more biased as the relative  
496 proportion of annual breeders in the population increased, or when some proportion of biennial  
497 breeders stochastically bred off-cycle (Appendix S1: Figure S3c). When we simulated a



498 population of females that bred on a triennial cycle and fit both an annual and multiennial model,  
499 results were similar to the case where all females bred on a biennial cycle, though the  
500 performance gap between the annual and multiennial model was greater with a population that  
501 breeds triennially (Appendix S1: Figure S4).

### 502 3.4 Aging uncertainty

503 The frequency with which samples were assigned to the incorrect cohort varied by age,  
504 with older individuals being more likely to be assigned to the wrong cohort (Appendix S1:  
505 Figure S5). The probability of age misassignment roughly corresponded to the slope of the von  
506 Bertalanffy growth curve, with the probability of age misassignment being greatest as the curve  
507 approached its asymptote (Appendix S1: Figure S5a). Consequently, the effects of aging error  
508 were minimal in the scenario in which sampling was targeted to YOY, as these individuals were  
509 far more likely to be assigned to the correct cohort (Appendix S1: Figure S5b).

510 When multiple age classes were represented in the data, bias accrued in estimates of  
511 female abundance and survival as the CV surrounding age assignment widened regardless of  
512 whether we simulated a population that bred annually or biennially (Figure 4b). Estimates of  $\lambda$   
513 had a tendency towards downward bias (Appendix S1: Figure S6a) while estimates of male  
514 abundance showed the same pattern as females (Appendix S1: Figure S6b). Targeted sampling of  
515 YOY showed a different trend, where increasing the CV on age assignment did not affect the  
516 bias of parameter estimates (Figure 4b) because the probability of misassigning an age-0  
517 individual to the wrong cohort was very low (Appendix S1: Figure S5, right column). These  
518 results confirm that reliable aging is a key component of CKMR and suggest that targeted  
519 sampling of age classes that can be reliably aged can improve model performance when accurate  
520 aging for some age classes is challenging.

521

### 522 3.5 Application to lemon shark data

523           When we applied our multiennial CKMR model (Eq. 4) to different subsets of data from  
524 lemon sharks in Bimini, Bahamas, the abundance trend showed a rise and fall in abundance from  
525 1997 – 2015, with peak abundance occurring between 2006 – 2010 depending on which subset  
526 of data was used (Figure 5a). The overall parabolic trend was the same whether we used the full  
527 dataset, the downsampled dataset, or five year intervals of data. Absolute estimates of abundance  
528 for breeding females were very low in all three cases (max = 41, Table 4), suggesting that a small  
529 number of mature females visit the North Island in Bimini to breed each year.

530           Estimates of adult survival generally agreed with the proposed range of possible values  
531 from other studies (see White et. al. 2014 for an overview), although the year-to-year consistency  
532 of survival estimates varied with the number of years sampled and richness of the dataset (Figure  
533 5b). When we used the full or downsampled dataset, estimates of survival converged as more  
534 years of data were included in the analysis, while the five-year interval dataset showed more  
535 variable estimates, consistent with our simulations that utilized fewer cohorts. All three datasets  
536 generally showed very high survival rates for mature female lemon sharks (>0.85).

537

## 538 **4. Discussion**

539           Obtaining unbiased estimates of abundance is a central challenge for effective  
540 conservation and management of many threatened and exploited populations, and is especially  
541 pertinent for populations of low density and highly mobile species where sampling of adults is  
542 largely intractable. Our simulation results broadly concur with recent work supporting CKMR as  
543 a promising approach to estimate abundance and survival in data-limited circumstances, but

544 emphasize the critical need to adapt CKMR models adequately to accommodate population  
545 dynamics and life history traits that violate the assumptions of a simple base-case model.  
546 Additionally, although we also confirm sensitivity of CKMR to aging error, our finding that bias  
547 in parameter estimates can be mitigated by focused sampling of as few as four cohorts that can  
548 be reliably aged provides options for applying the method in species where accurate aging is  
549 difficult. Finally, our application to lemon sharks in Bimini, Bahamas demonstrates that CKMR  
550 is a flexible framework that can be used to estimate abundance and survival of breeding adults  
551 when only juveniles are available for sampling. Taken together, our simulation results and  
552 application to lemon sharks demonstrate that CKMR is a robust tool for estimation of adult  
553 abundance and survival even when adults are not directly observed, making this framework a  
554 potentially powerful tool in monitoring programs for populations of low density and highly  
555 mobile species, including in data-limited circumstances.

556

#### 557 4.1 Accounting for population growth/decline

558 A simple base-case CKMR model (e.g., Eqs. 1 and 2) assumes that population abundance  
559 is stable over time, such that the quantities estimated by CKMR could equally apply to every  
560 reference year in the pairwise comparison matrix. If the assumption of a stable population size is  
561 inappropriate, or if estimates of underlying population parameters are desired, population  
562 dynamics can be modeled with CKMR using latent variables. By specifying a population growth  
563 model, data can be shared among cohorts to produce a single estimate of abundance for a  
564 specified estimation year, whereas without a growth model, estimates would be wholly  
565 independent for each cohort. Other studies have referred to the designation of an estimation year  
566 as “arbitrary” (Bradford et al. 2018). While this may be true in cases where sampling is extensive

567 and perfectly represents the age class distribution of the population, our simulation results  
568 suggest that parameter estimates become more biased as the year of estimation is projected  
569 outside the bounds of reference years in the dataset. Importantly, the reference years do not  
570 necessarily relate to the years of sampling, but rather to the cohorts (i.e. birth years) represented  
571 in the dataset (see Appendix S1, Table S2). If sampling includes a high proportion of older age  
572 classes, then the best estimation year for the dataset may extend farther into the past than the first  
573 year of sampling. Regardless, when specifying a population growth model in conjunction with  
574 CKMR, the specified estimation year should be calibrated to the distribution of reference years  
575 in the dataset, and not necessarily the years of sampling.

576         In our simulations, we chose to specify an exponential growth model where inter-annual  
577 population dynamics were broadly captured in the parameter  $\lambda$ . While inclusion of this parameter  
578 generally improved CKMR parameter estimation in scenarios of consistent population growth or  
579 decline, giving too much flexibility to the prior on  $\lambda$  impeded estimation of other parameters,  
580 particularly when few cohorts were represented in the data. In practical applications of CKMR,  
581 knowledge of a species' life history in combination with Leslie matrix simulations can help set  
582 realistic bounds on  $\lambda$  (e.g. Hillary et al. 2018); alternatively, ancillary data sources (e.g. CPUE)  
583 could be integrated into the model via specification of the prior on  $\lambda$ .

584

#### 585 4.2 Intermittent breeding dynamics

586         Intermittent breeding is a commonly observed reproductive strategy in long-lived species  
587 where reproduction bears additional “accessory” costs in terms of time, energy and/or survival  
588 (Shaw and Levin 2013), such as when reproduction includes migration to reproductive grounds  
589 and/or live-birth (Bull and Shine 1979). This strategy can be observed across a range of taxa

590 such as reptiles (Bauwens and Claus 2019), mammals (Desprez et al. 2018), birds (Cubaynes et  
591 al. 2011, Öst et al. 2018), teleosts (Morbey and Shuter 2013, Skjæraasen et al. 2020), and  
592 elasmobranchs (Feldheim et al. 2002, Nosal et al. 2021), including species of conservation  
593 concern like leatherback sea turtles (*Dermochelys coriacea*; [Rivalan et al. 2005](#)) and smalltooth  
594 sawfish (*Pristis pectinata*; Feldheim et al. 2017). When intermittent breeding coincides with a  
595 population that is most easily sampled during the juvenile life stage (e.g., when adults are not  
596 directly observed), our results indicate that abundance estimates derived from a CKMR model  
597 that relies on samples of juveniles and assumes annual breeding will be positively biased.  
598 However, the multiennial CKMR model presented here accommodates intermittent breeding via  
599 inclusion of the parameters  $\Psi$  and  $a$  (see Appendix S1, S1.3). While our model can accurately  
600 estimate  $\Psi$  in some highly controlled cases, in real populations, some proportion of individuals  
601 are likely to stochastically breed off-cycle, which can hinder the model's ability to estimate  $\Psi$   
602 even while it retains the ability to accurately estimate abundance and survival. The juxtaposition  
603 of biased estimates of  $\Psi$  with unbiased estimates of abundance and survival suggests that  $\Psi$   
604 provides needed flexibility for the model to accurately estimate other parameters, even though  
605 the parameter itself likely cannot be estimated under realistic conditions. Similarly, the parameter  
606  $a$  must be fixed to the expected breeding cycle. If the breeding cycle for a population is  
607 unknown, and if adults are not available for sampling, then it may be possible to estimate  $a$  from  
608 the dataset apart from the CKMR model (Waples and Feutry 2021). As a cursory example, if 50  
609 HSPs are found and nearly all were born in year gaps that are divisible by 2, then fixing  $a$  to 2  
610 would be a logical approach. If  $a$  can be fixed to a reasonable value, then the multiennial model  
611 presented here can produce reliable estimates of abundance and survival, opening the door for  
612 application of CKMR to populations that breed intermittently. Future work that adapts CKMR to

613 estimate  $\Psi$  and  $a$  across a range of scenarios would further expand the potential of CKMR to  
614 illuminate aspects of population breeding dynamics.

615

#### 616 4.3 Aging error

617 CKMR depends heavily on accurate cohort assignment, which can be very challenging  
618 for many species, including elasmobranchs. Our results confirm that age misassignment can  
619 substantially bias CKMR parameter estimates. A hierarchical model that accounts for aging error  
620 may help alleviate this issue, but such a model would require some estimate of the probability of  
621 age misassignment (Hirst et al. 2004, Schwarz and Runge 2009), which may not be available in  
622 data-limited situations. It is preferable, therefore, to treat ages as fixed if sufficient data are  
623 available to assign age with confidence. In cases where only YOY can be reliably aged, our  
624 results show that CKMR can generate reliable abundance estimates from as few as four cohorts,  
625 even for a population that breeds bi- or triennially. If mature individuals are also available to  
626 sample – e.g., when visiting a nursery site to breed – then sampling potential parents as well as  
627 YOY can enable the use of POPs in the likelihood and improve precision of parameter estimates.  
628 Aging error in this case would be less critical for adults as long as maturity can be confirmed in  
629 the year of sampling, though care must be taken to ensure that potential parents and offspring are  
630 sampled independently, as parameter estimates will be biased if the probability of sampling a  
631 parent is correlated with the probability of sampling its offspring (Bravington et al. 2016b).

632

#### 633 4.4 Population dynamics and abundance of lemon sharks in Bimini

634 Our application of CKMR to Bimini lemon sharks highlights the flexibility and potential of  
635 CKMR for long-term monitoring of populations of low density highly mobile species with

636 geographically distinct life histories. Estimates of abundance from CKMR suggest that a very  
637 small number of female lemon sharks give birth at the North Bimini Lagoon during each biennial  
638 breeding cycle (Table 4). These results align with a previous study that reconstructed a pedigree  
639 for the population and identified the number of adults that successfully bred at the North Island  
640 each year between 1995-2007 (DiBattista et al. 2011). In both cases, the number of females that  
641 gave birth at the North Island during this time period was estimated to be very small ( $< \sim 40$  per  
642 year), with an increasing abundance trend through 2006. At some point after 2006, however, our  
643 results suggest that the number of females using Bimini for breeding began to decline. Intense  
644 dredging and mangrove deforestation took place around the North Bimini Island in March 2001  
645 in preparation for development of a mega-resort (Jennings et al. 2008). Although the number of  
646 breeding females at the North Island counterintuitively increased immediately after the  
647 disturbance (DiBattista et al. 2011), there was a transient, but statistically significant, drop in the  
648 survival rates of age 0 and age 1 individuals (Jennings et al. 2008). These cohorts would have  
649 reached maturity and begun returning to Bimini for reproduction around 2013. Indeed, in our  
650 application of CKMR, we observed a declining abundance trend for adult females in 2013 in the  
651 full dataset as well as the two subsets of data (Figure 5), although the year in which the decline  
652 began varies depending on if/how the data were subsetted.

653 Although our results closely resemble those reported in DiBattista et. al. (2011), we note that  
654 our abundance estimates from CKMR were slightly higher. CKMR with small populations is an  
655 active area of research, as there is a known tendency to underestimate variance when the method  
656 is applied to populations with fewer than 100 individuals (M. Bravington, Pers. Comm.). When  
657 dealing with abundance estimates that are small enough to cause such issues, the practical  
658 implications of this known bias are likely minimal. For example, our model estimated a

659 maximum of 41 females visited the North Island across all 18 years of abundance estimation,  
660 regardless of if/how we subsetted the dataset (Table 4). This value is small enough that any  
661 amount of added fishing pressure would likely threaten the sustainability of this portion of the  
662 population, especially if the true abundance is lower than what CKMR estimates.

663 Recognizing that the dataset for lemon sharks is uniquely rich in terms of the proportion of  
664 the population sampled and the decades over which sampling occurred, we applied CKMR to  
665 two different subsets of data: one that reduced sampling intensity each year and one that reduced  
666 the number of years over which sampling occurred. In both cases, the abundance estimates and  
667 trend were similar to the results we obtained using the full dataset, demonstrating the robustness  
668 of CKMR to less exhaustive and extensive sampling efforts. Indeed, one of the more exciting  
669 aspects of CKMR is its potential to generate rapid estimates of adult abundance without  
670 sampling a single adult (see Patterson et al. 2022b for an applied example). Once a reliable  
671 genotyping panel, workflow for assigning kinship, and appropriate CKMR model are developed  
672 for a population (see Appendix S1, Figure S7), contemporary abundance estimates could  
673 conceivably be obtained within weeks of sampling. As such, CKMR can offer a rapid and cost-  
674 effective method for population monitoring in real time following an initial investment in the  
675 laboratory and analytical workflows.

676

#### 677 4.5 Implications for sampling design

678 We have shown that application of CKMR to long-lived species can generate reliable  
679 estimates of abundance from a limited number of cohorts as long as aging is reliable; however,  
680 estimates of all parameters – especially non-abundance parameters – are more reliable when  
681 more cohorts are included in the dataset. We observed this in our simulations as well as the



682 lemon shark dataset, where estimates of survival converged as more cohorts were added to the  
683 dataset. A dataset that spans enough cohorts to reliably estimate parameters beyond abundance  
684 can be obtained via intense sampling of multiple age classes over a small number of years, but  
685 this strategy would require reliable aging of all sampled age classes to avoid biased parameter  
686 estimates. Alternatively, long-term non-lethal sampling of nursery areas represents another way  
687 that CKMR can be used to monitor low density highly mobile populations in circumstances  
688 where aging error is likely for older age classes. We are not the first to suggest that CKMR  
689 benefits from focusing sampling efforts on individuals that can be reliably aged (Trenkel et al.  
690 2022), but our results are the first to demonstrate empirically that this approach can mitigate the  
691 bias that accrues when aging is less certain. In cases where sampling of juveniles is focused on  
692 nursery areas, sufficient biological knowledge to determine the scope of inference for CKMR  
693 will be required.

694

## 695 **Conclusion and Future Directions**

696 CKMR is a powerful tool for estimating population abundance of species that have been  
697 historically difficult to assess. However, CKMR is not a panacea, and reliable application of the  
698 method requires careful consideration of the relevant population dynamics matched to an  
699 appropriate sampling scheme. Here, we have shown that abundance estimates derived from  
700 CKMR are robust to a variety of sampling schemes, provided substantial population  
701 growth/decline and intermittent breeding dynamics are accounted for, while estimates of survival  
702 and population growth/decline rate are more sensitive to sampling constraints. When ages are  
703 prone to misassignment, focusing sampling efforts on individuals with known ages (e.g., YOY),  
704 or subsampling for these individuals if the dataset is sufficiently rich, can alleviate bias in

705 parameter estimates, particularly abundance. Long-term monitoring of highly mobile species can  
706 be enhanced by CKMR via sampling of nursery areas when one or both sexes are philopatric,  
707 and can provide estimates of present-day abundance and abundance trends for adults that visit  
708 the nursery area without directly sampling a single adult. Overall, this study highlights the  
709 sensitivity of simple base-case CKMR models to assumptions about population dynamics and  
710 sampling, while also demonstrating that the CKMR framework is easily adaptable to  
711 accommodate these factors, making it a promising tool for integration into long-term monitoring  
712 programs.

713

#### 714 **Acknowledgements**

715 Thanks to the hundreds of volunteers and staff at the Bimini Biological Field Station that  
716 sampled and tagged lemon sharks. Thank you also to Paul Conn and Shane Baylis for guidance  
717 with regards to CKMR model construction and individual-based simulation during the initial  
718 phase of the project, and Andy Lin and Patrick Sadil for assistance with code that was integrated  
719 into construction of the pairwise comparison matrix. We are grateful to Chris Sutherland for  
720 invaluable support during model validation, and to Mark Bravington, Mark Maunder, Kevin  
721 Piner, and Steve Teo for conversations and suggestions that guided our sensitivity tests.  
722 Members of the Molecular Ecology and Conservation Lab at UMass Amherst provided helpful  
723 feedback and encouragement on manuscript drafts. This work was completed using resources  
724 provided by the University of Massachusetts' Green High Performance Computing Cluster  
725 (GHGCC). Funding was provided to JDS by the American Fisheries Society via the Steven  
726 Berkeley Conservation Fellowship and the UMass Amherst Organismic and Evolutionary  
727 Biology program.

728 **References**

- 729 Ailloud, L. E., M. W. Smith, A. Y. Then, K. L. Omori, G. M. Ralph, and J. M. Hoenig. 2015.  
730 Properties of age compositions and mortality estimates derived from cohort slicing of  
731 length data. *ICES Journal of Marine Science* 72:44–53.
- 732 Amstrup, S. C., T. L. McDonald, and B. F. Manly. 2010. *Handbook of capture-recapture*  
733 *analysis*. Princeton University Press.
- 734 Bauwens, D., and K. Claus. 2019. Intermittent reproduction, mortality patterns and lifetime  
735 breeding frequency of females in a population of the adder (*Vipera berus*). *PeerJ*  
736 7:e6912.
- 737 Berryman, A. A. 1989. The Conceptual Foundations of Ecological Dynamics. *Bulletin of the*  
738 *Ecological Society of America* 70:230–236.
- 739 Boyd, C., J. Barlow, E. A. Becker, K. A. Forney, T. Gerrodette, J. E. Moore, and A. E. Punt.  
740 2018. Estimation of population size and trends for highly mobile species with dynamic  
741 spatial distributions. *Diversity and Distributions* 24:1–12.
- 742 Bradford, R., R. Thomson, M. Bravington, D. Foote, R. M. Gunasekera, B. Bruce, D. Harasti, N.  
743 Otway, and P. Feutry. 2018. A close-kin mark-recapture estimate of the population size  
744 and trend of east coast grey nurse shark.
- 745 Bravington, M., P. Feutry, R. D. Pillans, R. Hillary, G. Johnson, T. M. Saunders, R. M.  
746 Gunasekera, N. Bax, and P. M. Kyne. 2019. Close-Kin Mark-Recapture population size  
747 estimate of *Glyphis garricki* in the Northern Territory.
- 748 Bravington, M. V., P. M. Grewe, and C. R. Davies. 2016a. Absolute abundance of southern  
749 bluefin tuna estimated by close-kin mark-recapture. *Nature Communications* 7:13162.

- 750 Bravington, M. V., H. J. Skaug, and E. C. Anderson. 2016b. Close-Kin Mark-Recapture.  
751 *Statistical Science* 31:259–274.
- 752 Brooks, J. L., T. L. Guttridge, B. R. Franks, R. D. Grubbs, D. D. Chapman, S. H. Gruber, J. D.  
753 Dibattista, and K. A. Feldheim. 2016. Using genetic inference to re-evaluate the  
754 minimum longevity of the lemon shark *Negaprion brevirostris*. *Journal of Fish Biology*  
755 88:2067–2074.
- 756 Brown, C. A., and S. H. Gruber. 1988. Age Assessment of the Lemon Shark, *Negaprion*  
757 *brevirostris*, Using Tetracycline Validated Vertebral Centra. *Copeia* 1988:747–753.
- 758 Bull, J. J., and R. Shine. 1979. Iteroparous Animals that Skip Opportunities for Reproduction.  
759 *The American Naturalist* 114:296–303.
- 760 Cailliet, G. M. 2015. Perspectives on elasmobranch life-history studies: a focus on age validation  
761 and relevance to fishery management. *Journal of Fish Biology* 87:1271–1292.
- 762 Campbell, R. A. 2015. Constructing stock abundance indices from catch and effort data: Some  
763 nuts and bolts. *Fisheries Research* 161:109–130.
- 764 Carbone, C., N. Pettorelli, and P. A. Stephens. 2011. The bigger they come, the harder they fall:  
765 body size and prey abundance influence predator–prey ratios. *Biology Letters* 7:312–315.
- 766 Carlson, J., P. Charvet, A. Ba, J. Bizzarro, D. Derrick, M. Espinoza, P. Doherty, E. Chartrain, M.  
767 Dia, and G. H. L. Leurs. 2021. *Negaprion Brevirostris*. The IUCN Red List of Threatened  
768 Species:2021–1.
- 769 Chapman, D. D., E. A. Babcock, S. H. Gruber, J. D. Dibattista, B. R. Franks, S. A. Kessel, T.  
770 Guttridge, E. K. Pikitch, and K. A. Feldheim. 2009. Long-term natal site-fidelity by  
771 immature lemon sharks (*Negaprion brevirostris*) at a subtropical island. *Molecular*  
772 *Ecology* 18:3500–3507.

- 773 Conn, P. B., M. V. Bravington, S. Baylis, and J. M. Ver Hoef. 2020. Robustness of close-kin  
774 mark–recapture estimators to dispersal limitation and spatially varying sampling  
775 probabilities. *Ecology and Evolution* 10:5558–5569.
- 776 Cormack, R. M. 1964. Estimates of Survival from the Sighting of Marked Animals. *Biometrika*  
777 51:429–438.
- 778 Cortés, E., and E. N. Brooks. 2018. Stock status and reference points for sharks using data-  
779 limited methods and life history. *Fish and Fisheries* 19:1110–1129.
- 780 Cubaynes, S., P. F. Doherty, E. A. Schreiber, and O. Gimenez. 2011. To breed or not to breed: a  
781 seabird’s response to extreme climatic events. *Biology Letters* 7:303–306.
- 782 Davis, K. L., E. D. Silverman, A. L. Sussman, R. R. Wilson, and E. F. Zipkin. 2022. Errors in  
783 aerial survey count data: Identifying pitfalls and solutions. *Ecology and Evolution*  
784 12:e8733.
- 785 Delaval, A., V. Bendall, S. J. Hetherington, H. J. Skaug, M. Frost, C. S. Jones, and L. R. Noble.  
786 2022. Evaluating the suitability of close-kin mark-recapture as a demographic modelling  
787 tool for a critically endangered elasmobranch population. *Evolutionary Applications*.
- 788 Desprez, M., O. Gimenez, C. R. McMahon, M. A. Hindell, and R. G. Harcourt. 2018.  
789 Optimizing lifetime reproductive output: Intermittent breeding as a tactic for females in a  
790 long-lived, multiparous mammal. *Journal of Animal Ecology* 87:199–211.
- 791 DiBattista, J. D., K. A. Feldheim, D. Garant, S. H. Gruber, and A. P. Hendry. 2011.  
792 Anthropogenic disturbance and evolutionary parameters: a lemon shark population  
793 experiencing habitat loss. *Evolutionary Applications* 4:1–17.

- 794 Dibattista, J. D., K. A. Feldheim, S. H. Gruber, and A. P. Hendry. 2007. When bigger is not  
795 better: selection against large size, high condition and fast growth in juvenile lemon  
796 sharks. *Journal of Evolutionary Biology* 20:201–212.
- 797 Dulvy, N. K., N. Pacoureau, C. L. Rigby, R. A. Pollom, R. W. Jabado, D. A. Ebert, B. Finucci,  
798 C. M. Pollock, J. Cheok, D. H. Derrick, K. B. Herman, C. S. Sherman, W. J.  
799 VanderWright, J. M. Lawson, R. H. L. Walls, J. K. Carlson, P. Charvet, K. K. Bineesh,  
800 D. Fernando, G. M. Ralph, J. H. Matsushiba, C. Hilton-Taylor, S. V. Fordham, and C. A.  
801 Simpfendorfer. 2021. Overfishing drives over one-third of all sharks and rays toward a  
802 global extinction crisis. *Current Biology* 31:4773-4787.e8.
- 803 Ellegren, H., and N. Galtier. 2016. Determinants of genetic diversity. *Nature Reviews Genetics*  
804 17:422–433.
- 805 Feldheim, K. A., S. H. Gruber, and M. V. Ashley. 2002. The breeding biology of lemon sharks at  
806 a tropical nursery lagoon. *Proceedings of the Royal Society B: Biological Sciences*  
807 269:1655–1661.
- 808 Feldheim, K. A., S. H. Gruber, and M. V. Ashley. 2004. Reconstruction of Parental  
809 Microsatellite Genotypes Reveals Female Polyandry and Philopatry in the Lemon Shark,  
810 *Negaprion brevirostris*. *Evolution* 58:2332–2342.
- 811 Feldheim, K. A., S. H. Gruber, J. D. DiBattista, E. A. Babcock, S. T. Kessel, A. P. Hendry, E. K.  
812 Pikitch, M. V. Ashley, and D. D. Chapman. 2014. Two decades of genetic profiling  
813 yields first evidence of natal philopatry and long-term fidelity to parturition sites in  
814 sharks. *Molecular Ecology* 23:110–117.

- 815 Feldheim, K., A. Fields, D. Chapman, R. Scharer, and G. Poulakis. 2017. Insights into  
816 reproduction and behavior of the smalltooth sawfish *Pristis pectinata*. *Endangered*  
817 *Species Research* 34:463–471.
- 818 Ferretti, F., B. Worm, G. L. Britten, M. R. Heithaus, and H. K. Lotze. 2018. Patterns and  
819 ecosystem consequences of shark declines in the ocean. *Ecology Letters*:1055–1071.
- 820 Feutry, P., O. Berry, P. M. Kyne, R. D. Pillans, R. M. Hillary, P. M. Grewe, J. R. Marthick, G.  
821 Johnson, R. M. Gunasekera, N. J. Bax, and M. Bravington. 2017. Inferring contemporary  
822 and historical genetic connectivity from juveniles. *Molecular Ecology* 26:444–456.
- 823 Førland, B. 2019. *Close-Kin Mark-Recapture Models*:80.
- 824 Guttridge, T. L., M. P. M. Van Zinnicq Bergmann, C. Bolte, L. A. Howey, J. S. Finger, S. T.  
825 Kessel, J. L. Brooks, W. Winram, M. E. Bond, L. K. B. Jordan, R. C. Cashman, E. R.  
826 Tolentino, R. D. Grubbs, and S. H. Gruber. 2017. Philopatry and Regional Connectivity  
827 of the Great Hammerhead Shark, *Sphyrna mokarran* in the U.S. and Bahamas. *Frontiers*  
828 *in Marine Science* 4.
- 829 Gwinn, D. C., M. S. Allen, and M. W. Rogers. 2010. Evaluation of procedures to reduce bias in  
830 fish growth parameter estimates resulting from size-selective sampling. *Fisheries*  
831 *Research* 105:75–79.
- 832 Hansell, A. C., T. H. Curtis, J. Carlson, E. Cortés, G. Fay, and S. X. Cadrin. 2021. Stock  
833 Assessment of the Lemon Shark off the Southeast United States. *North American Journal*  
834 *of Fisheries Management* 41:35–48.
- 835 Hansell, A. C., S. T. Kessel, L. R. Brewster, S. X. Cadrin, S. H. Gruber, G. B. Skomal, and T. L.  
836 Guttridge. 2018. Local indicators of abundance and demographics for the coastal shark  
837 assemblage of Bimini, Bahamas. *Fisheries Research* 197:34–44.

- 838 Harley, S. J., R. A. Myers, and A. Dunn. 2001. Is catch-per-unit-effort proportional to  
839 abundance? *Canadian Journal of Fisheries and Aquatic Sciences* 58:1760–1772.
- 840 Hassell, M. P. 1975. Density-Dependence in Single-Species Populations. *Journal of Animal*  
841 *Ecology* 44:283–295.
- 842 Herrando-Pérez, S., S. Delean, B. W. Brook, and C. J. A. Bradshaw. 2012. Density dependence:  
843 an ecological Tower of Babel. *Oecologia* 170:585–603.
- 844 Heupel, M., J. Carlson, and C. Simpfendorfer. 2007. Shark nursery areas: concepts, definition,  
845 characterization and assumptions. *Marine Ecology Progress Series* 337:287–297.
- 846 Higgs, J. M., E. R. Hoffmayer, J. A. Sulikowski, W. B. Driggers, D. A. Stiller, J. M. Hendon, J.  
847 M. Higgs, E. R. Hoffmayer, J. A. Sulikowski, W. B. Driggers, D. A. Stiller, and J. M.  
848 Hendon. 2020. Reproductive biology of the finetooth shark (*Carcharhinus isodon*) in the  
849 northern Gulf of Mexico, with evidence of both annual and biennial reproduction. *Marine*  
850 *and Freshwater Research* 72:693–708.
- 851 Hillary, R. M., M. V. Bravington, T. A. Patterson, P. Grewe, R. Bradford, P. Feutry, R.  
852 Gunasekera, V. Peddemors, J. Werry, M. P. Francis, C. a. J. Duffy, and B. D. Bruce.  
853 2018. Genetic relatedness reveals total population size of white sharks in eastern  
854 Australia and New Zealand. *Scientific Reports* 8:2661.
- 855 Hirst, D., S. Aanes, G. Storvik, R. B. Huseby, and I. F. Tvette. 2004. Estimating catch at age from  
856 market sampling data by using a Bayesian hierarchical model. *Journal of the Royal*  
857 *Statistical Society: Series C (Applied Statistics)* 53:1–14.
- 858 Jacoby, D. M. P., D. P. Croft, and D. W. Sims. 2012. Social behaviour in sharks and rays:  
859 analysis, patterns and implications for conservation. *Fish and Fisheries* 13:399–417.



- 860 Jennings, D. E., S. H. Gruber, B. R. Franks, S. T. Kessel, and A. L. Robertson. 2008. Effects of  
861 large-scale anthropogenic development on juvenile lemon shark (*Negaprion brevirostris*)  
862 populations of Bimini, Bahamas. *Environmental Biology of Fishes* 83:369–377.
- 863 Jennings, S. 2000. Patterns and prediction of population recovery in marine reserves. *Reviews in*  
864 *Fish Biology and Fisheries* 10:209–231.
- 865 Jolly, G. M. 1965. Explicit Estimates from Capture-Recapture Data with Both Death and  
866 Immigration-Stochastic Model. *Biometrika* 52:225–247.
- 867 Kendall, W. L. 1999. Robustness of Closed Capture–Recapture Methods to Violations of the  
868 Closure Assumption. *Ecology* 80:2517–2525.
- 869 Kindsvater, H. K., N. K. Dulvy, C. Horswill, M.-J. Juan-Jordá, M. Mangel, and J. Matthiopoulos.  
870 2018. Overcoming the Data Crisis in Biodiversity Conservation. *Trends in Ecology &*  
871 *Evolution* 33:676–688.
- 872 Kohler, N. E., and P. A. Turner. 2001. Shark tagging: a review of conventional methods and  
873 studies. *The behavior and sensory biology of elasmobranch fishes: an anthology in*  
874 *memory of Donald Richard Nelson*:191–224.
- 875 Lynch, P. D., K. W. Shertzer, and R. J. Latour. 2012. Performance of methods used to estimate  
876 indices of abundance for highly migratory species. *Fisheries Research* 125–126:27–39.
- 877 Magera, A. M., J. E. M. Flemming, K. Kaschner, L. B. Christensen, and H. K. Lotze. 2013.  
878 *Recovery Trends in Marine Mammal Populations*. *PLOS ONE* 8:e77908.
- 879 Marcy-Quay, B., S. A. Sethi, N. O. Therkildsen, and C. E. Kraft. 2020. Expanding the feasibility  
880 of fish and wildlife assessments with close-kin mark–recapture. *Ecosphere* 11:e03259.
- 881 Maunder, M. N., and A. E. Punt. 2004. Standardizing catch and effort data: a review of recent  
882 approaches. *Fisheries Research* 70:141–159.

- 883 Maunder, M., J. Sibert, A. Fonteneau, J. Hampton, P. Kleiber, and S. Harley. 2006. Interpreting  
884 catch per unit effort data to assess the status of individual stocks and communities. *ICES*  
885 *Journal of Marine Science* 63:1373–1385.
- 886 McCauley, D. J., K. A. McLean, J. Bauer, H. S. Young, and F. Micheli. 2012. Evaluating the  
887 performance of methods for estimating the abundance of rapidly declining coastal shark  
888 populations. *Ecological Applications* 22:385–392.
- 889 Morbey, Y. E., and B. J. Shuter. 2013. Intermittent breeding in the absence of a large cost of  
890 reproduction: evidence for a non-migratory, iteroparous salmonid. *Ecosphere* 4:art150.
- 891 Morrissey, J. F., and S. H. Gruber. 1993. Home Range of Juvenile Lemon Sharks, *Negaprion*  
892 *brevirostris*. *Copeia* 1993:425–434.
- 893 Nosal, A. P., D. P. Cartamil, A. J. Ammann, L. F. Bellquist, N. J. Ben-Aderet, K. M. Blincow, E.  
894 S. Burns, E. D. Chapman, R. M. Freedman, A. P. Klimley, R. K. Logan, C. G. Lowe, B.  
895 X. Semmens, C. F. White, and P. A. Hastings. 2021. Triennial migration and philopatry  
896 in the critically endangered soupfin shark *Galeorhinus galeus*. *Journal of Applied*  
897 *Ecology* 58:1570–1582.
- 898 Öst, M., A. Lindén, P. Karell, S. Ramula, and M. Kilpi. 2018. To breed or not to breed: drivers  
899 of intermittent breeding in a seabird under increasing predation risk and male bias.  
900 *Oecologia* 188:129–138.
- 901 Patterson, T. A., R. Hillary, P. Feutry, R. Gunasakera, J. Marthick, and R. D. Pillans. 2022a,  
902 February 27. Rapid estimation of cryptic adult abundance and breeding dynamics in a  
903 critically endangered elasmobranch from close-kin mark recapture. *bioRxiv*.  
904 <https://doi.org/10.1101/2022.02.24.481858>

- 905 Patterson, T. A., R. M. Hillary, P. M. Kyne, R. D. Pillans, R. M. Gunasekera, J. R. Marthick, G.  
906 J. Johnson, and P. Feutry. 2022b. Rapid assessment of adult abundance and demographic  
907 connectivity from juvenile kin pairs in a critically endangered species. *Science Advances*  
908 8:eadd1679.
- 909 Peterson, C. D., M. J. Wilberg, E. Cortés, and R. J. Latour. 2021. Dynamic factor analysis to  
910 reconcile conflicting survey indices of abundance. *ICES Journal of Marine Science*  
911 78:1711–1729.
- 912 Pollock, K. H. 2000. Capture-Recapture Models. *Journal of the American Statistical Association*  
913 95:293–296.
- 914 Rivalan, P., A.-C. Prévot-Julliard, R. Choquet, R. Pradel, B. Jacquemin, and M. Girondot. 2005.  
915 Trade-off between current reproductive effort and delay to next reproduction in the  
916 leatherback sea turtle. *Oecologia* 145:564–574.
- 917 Robertson, D. R. 1996. Interspecific Competition Controls Abundance and Habitat Use of  
918 Territorial Caribbean Damsel Fishes. *Ecology* 77:885–899.
- 919 Rowat, D., M. G. Meekan, U. Engelhardt, B. Pardigon, and M. Vely. 2007. Aggregations of  
920 juvenile whale sharks (*Rhincodon typus*) in the Gulf of Tadjoura, Djibouti.  
921 *Environmental Biology of Fishes* 80:465–472.
- 922 Ruzzante, D. E., G. R. McCracken, B. Førlund, J. MacMillan, D. Notte, C. Buhariwalla, J. Mills  
923 Flemming, and H. Skaug. 2019. Validation of close-kin mark–recapture (CKMR)  
924 methods for estimating population abundance. *Methods in Ecology and Evolution*  
925 10:1445–1453.
- 926 Schwarz, C. J., and G. A. Seber. 1999. A review of estimating animal abundance III. *Statistical*  
927 *Science* 14:427–456.

- 928 Schwarz, L. K., and M. C. Runge. 2009. Hierarchical Bayesian analysis to incorporate age  
929 uncertainty in growth curve analysis and estimates of age from length: Florida manatee  
930 (*Trichechus manatus*) carcasses. *Canadian Journal of Fisheries and Aquatic Sciences*  
931 66:1775–1789.
- 932 Seber, G. A. F. 1965. A Note on the Multiple-Recapture Census. *Biometrika* 52:249–259.
- 933 Shaw, A. K., and S. A. Levin. 2013. The evolution of intermittent breeding. *Journal of*  
934 *Mathematical Biology* 66:685–703.
- 935 Skaug, H. J. 2001. Allele-Sharing Methods for Estimation of Population Size. *Biometrics*  
936 57:750–756.
- 937 Skjæraasen, J. E., K. Korsbrekke, G. E. Dingsør, Ø. Langangen, A. F. Opdal, and C. Jørgensen.  
938 2020. Large annual variation in the amount of skipped spawning for female Northeast  
939 Arctic haddock *Melanogrammus aeglefinus*. *Fisheries Research* 230:105670.
- 940 Snelson, F. F., and S. E. Williams. 1981. Notes on the Occurrence, Distribution, and Biology of  
941 Elasmobranch Fishes in the Indian River Lagoon System, Florida. *Estuaries* 4:110.
- 942 Trenkel, V. M., G. Charrier, P. Lorance, and M. V. Bravington. 2022. Close-kin mark–recapture  
943 abundance estimation: practical insights and lessons learned. *ICES Journal of Marine*  
944 *Science:fsac002*.
- 945 Vaudo, J., and M. Heithaus. 2011. Dietary niche overlap in a nearshore elasmobranch  
946 mesopredator community. *Marine Ecology Progress Series* 425:247–260.
- 947 Waples, R. S., and P. Feutry. 2021. Close-kin methods to estimate census size and effective  
948 population size. *Fish and Fisheries:faf.12615*.
- 949 Ward-Paige, C. A., D. M. Keith, B. Worm, and H. K. Lotze. 2012. Recovery potential and  
950 conservation options for elasmobranchs. *Journal of Fish Biology* 80:1844–1869.

- 951 Webster, M. S., P. P. Marra, S. M. Haig, S. Bensch, and R. T. Holmes. 2002. Links between  
952 worlds: unraveling migratory connectivity. *Trends in Ecology & Evolution* 17:76–83.
- 953 White, E. R., J. D. Nagy, and S. H. Gruber. 2014. Modeling the population dynamics of lemon  
954 sharks. *Biology Direct* 9.
- 955 Wilson, G. J., and R. J. Delahay. 2001. A review of methods to estimate the abundance of  
956 terrestrial carnivores using field signs and observation. *Wildlife Research* 28:151–164.
- 957 Wilson, H. B., B. E. Kendall, and H. P. Possingham. 2011. Variability in Population Abundance  
958 and the Classification of Extinction Risk. *Conservation Biology* 25:747–757.
- 959

960 **Table 1:** Simulation scenarios for data-generating model and estimation model.

| Scenario | Test                                                    | 10 year mean $\lambda$ | 10 year sd $\lambda$ | Model equation(s) used | Aging     | CV on aging error |
|----------|---------------------------------------------------------|------------------------|----------------------|------------------------|-----------|-------------------|
| 1        | Model validation                                        | 1                      | 0.003                | Eq. 2                  | Precise   | NA                |
| 2.1      | Slight population decline                               | 0.99                   | 0.003                | Eq. 2, Eq. 3           | Precise   | NA                |
| 2.2      | Slight population growth                                | 1.01                   | 0.002                | Eq. 2, Eq. 3           | Precise   | NA                |
| 2.3      | Severe population decline                               | 0.93                   | 0.01                 | Eq. 2, Eq. 3           | Precise   | NA                |
| 3.1      | 100% biennial breeders                                  | 1                      | 0.003                | Eq. 3, Eq. 4           | Precise   | NA                |
| 3.2      | 90% biennial breeders                                   | 1                      | 0.003                | Eq. 3, Eq. 4           | Precise   | NA                |
| 3.3      | 75% biennial breeders                                   | 1                      | 0.003                | Eq. 3, Eq. 4           | Precise   | NA                |
| 3.4      | 50% biennial breeders                                   | 1                      | 0.003                | Eq. 3, Eq. 4           | Precise   | NA                |
| 3.5      | 100% triennial breeders                                 | 1                      | 0.003                | Eq. 3, Eq. 4           | Precise   | NA                |
| 3.6      | 100% biennial breeders w/ stochastic off-cycle breeding | 1                      | 0.003                | Eq. 3, Eq. 4           | Precise   | NA                |
| 4.1      | Minimal age-length uncertainty                          | 1                      | 0.003                | Eq. 3, Eq. 4           | Imprecise | 5%                |
| 4.2      | Moderate age-length uncertainty                         | 1                      | 0.003                | Eq. 3, Eq. 4           | Imprecise | 10%               |
| 4.3      | Substantial age-length uncertainty                      | 1                      | 0.003                | Eq. 3, Eq. 4           | Imprecise | 20%               |

961 *Note:*  $\lambda$  is the annual population growth/decline rate.

962

963 **Table 2:** Priors used in CKMR model for results highlighted in text and figures.

| Objective                  | $N_s$                                                                                                                  | $\Phi$               | $\lambda$ prior                                    | $\psi$        |
|----------------------------|------------------------------------------------------------------------------------------------------------------------|----------------------|----------------------------------------------------|---------------|
| 1: Model validation        | $N_s \sim \text{Normal}(\mu, \sigma)$<br>$\mu \sim \text{Uniform}(1, 10000)$<br>$\sigma \sim \text{Uniform}(1, 10000)$ | Beta(69.175, 14.673) | None                                               | NA            |
| 2: Population change       | Same as 1                                                                                                              | Uniform(0.5, 0.95)   | None<br>Uniform(0.95, 1.05)<br>Uniform(0.80, 1.20) | NA            |
| 3: Intermittent breeding   | Same as 1                                                                                                              | Uniform(0.5, 0.95)   | Uniform(0.95, 1.05)                                | Uniform(0, 1) |
| 4. Aging uncertainty       | Same as 1                                                                                                              | Uniform(0.5, 0.95)   | Uniform(0.95, 1.05)                                | Uniform(0, 1) |
| 5: Bimini lemon shark data | Same as 1                                                                                                              | Uniform(0.5, 0.99)   | Uniform(0.95, 1.05)                                | Uniform(0, 1) |

964 *Note:*  $\lambda$  is the annual population growth/decline rate;  $N_s$  is sex specific adult abundance;  $\Phi$  is  
 965 annual adult survival (not sex-specific);  $\psi$  is the proportion of individuals that breed every  $a$   
 966 years.

967

968 **Table 3:** Relative bias, HSPs, and percent in the 95% HPDI for female abundance ( $N_{\text{f}}$ ) under  
 969 different scenarios using the model that was adapted for each scenario.

| Equation            | Scenario                                    | Target YOY |    |           |           | Sample all juveniles |    |           |           | Sample all ages |     |           |           |       |
|---------------------|---------------------------------------------|------------|----|-----------|-----------|----------------------|----|-----------|-----------|-----------------|-----|-----------|-----------|-------|
|                     |                                             | HSPs       | CV | % in HPDI | Rel. bias | HSPs                 | CV | % in HPDI | Rel. bias | HSPs            | CV  | % in HPDI | Rel. bias |       |
| Eq. 2               | 1: model validation                         | 149        | 10 | 99        | 2.47      | 136                  | 11 | 96        | 3.01      | 15              | 144 | 10        | 94        | 2.39  |
| Eq. 3               | 2.1: slight decline                         | 74         | 21 | 98        | 1.57      | 65                   | 18 | 92        | 6.08      | 5               | 67  | 17        | 96        | 5.43  |
| Eq. 3               | 2.2: slight growth                          | 272        | 14 | 98        | 6.35      | 263                  | 9  | 94        | 2.39      | 17              | 270 | 9         | 95        | 2.32  |
| Eq. 3               | 2.3: severe decline                         | 85         | 33 | 98        | 18.4      | 59                   | 20 | 95        | 9.77      | 8               | 66  | 18        | 96        | 5.22  |
| Eq. 4               | 3.1: 100% biennial breeders                 | 101        | 22 | 97        | 6.13      | 130                  | 14 | 93        | 6.61      | 15              | 111 | 13        | 91        | 5.66  |
| Eq. 4               | 3.2: 90% biennial breeders                  | 132        | 20 | 98        | -0.84     | 152                  | 13 | 91        | -1.93     | 15              | 130 | 12        | 93        | -0.75 |
| Eq. 4               | 3.3: 75% biennial breeders                  | 161        | 18 | 94        | -3.79     | 170                  | 12 | 83        | -6.26     | 15              | 145 | 12        | 88        | -4.1  |
| Eq. 4               | 3.4: 50% biennial breeders                  | 185        | 17 | 97        | -4.44     | 179                  | 11 | 85        | -6.06     | 15              | 153 | 11        | 86        | -4.45 |
| Eq. 4               | 3.5: 100% triennial breeders                | 53         | 29 | 99        | 18.7      | 98                   | 17 | 92        | 7.55      | 14              | 84  | 15        | 94        | 7.47  |
| Eq. 4               | 3.6: 100% biennial breeders + stochasticity | 121        | 20 | 98        | 5.98      | 140                  | 13 | 90        | 5.97      | 16              | 121 | 12        | 93        | 3.95  |
| Eq. 3 (annual)      | 4.1: 5% CV                                  | 179        | 16 | 98        | 5.2       | 164                  | 11 | 90        | 8.61      | 9               | 141 | 12        | 89        | 8.97  |
| Eq. 4 (multiennial) |                                             | 102        | 22 | 97        | 6.3       | 148                  | 12 | 83        | 15.4      | 9               | 125 | 13        | 85        | 14.5  |
| Eq. 3 (annual)      | 4.2: 10% CV                                 | 179        | 16 | 98        | 5.2       | 162                  | 11 | 84        | 13        | 8               | 140 | 12        | 84        | 13.2  |
| Eq. 4 (multiennial) |                                             | 102        | 22 | 97        | 6.3       | 149                  | 12 | 77        | 17.9      | 8               | 125 | 13        | 74        | 20.2  |
| Eq. 3 (annual)      | 4.3: 20% CV                                 | 179        | 16 | 98        | 5.2       | 158                  | 11 | 57        | 24.4      | 7               | 138 | 12        | 61        | 25.2  |
| Eq. 4 (multiennial) |                                             | 102        | 22 | 97        | 6.3       | 145                  | 12 | 48        | 28.8      | 7               | 123 | 13        | 43        | 34    |



970 **Table 4:** Abundance estimates and sampling metrics for Bimini lemon sharks when a CKMR  
 971 model adapted for intermittent breeding was fit to the full dataset, a downsampled dataset in  
 972 which 30% of samples were retained for each year, and a subset of the full dataset in which five-  
 973 years of data were used to estimate abundance in each year.

| Estimation year | Full dataset |           |               |       | Downsampled dataset |           |               |       | Five year intervals |           |               |       |
|-----------------|--------------|-----------|---------------|-------|---------------------|-----------|---------------|-------|---------------------|-----------|---------------|-------|
|                 | Median       | 95% HPDI  | Total samples | MHSPs | Median              | 95% HPDI  | Total samples | MHSPs | Median              | 95% HPDI  | Total samples | MHSPs |
| 1997            | 15           | (10 - 19) | 104           | 105   | 14                  | (5 - 28)  | 33            | 11    | 15                  | (10 - 19) | 104           | 105   |
| 1998            | 15           | (11 - 18) | 121           | 141   | 12                  | (4 - 23)  | 39            | 15    | 15                  | (10 - 19) | 115           | 113   |
| 1999            | 18           | (14 - 22) | 157           | 239   | 23                  | (7 - 49)  | 50            | 13    | 18                  | (12 - 23) | 143           | 180   |
| 2000            | 19           | (15 - 22) | 180           | 306   | 16                  | (10 - 24) | 57            | 33    | 18                  | (13 - 23) | 134           | 130   |
| 2001            | 20           | (15 - 25) | 214           | 357   | 26                  | (13 - 41) | 68            | 30    | 13                  | (7 - 22)  | 146           | 111   |
| 2002            | 26           | (22 - 31) | 251           | 462   | 24                  | (14 - 35) | 80            | 45    | 32                  | (24 - 40) | 147           | 100   |
| 2003            | 29           | (24 - 33) | 283           | 564   | 27                  | (18 - 38) | 90            | 57    | 38                  | (30 - 47) | 162           | 113   |
| 2004            | 32           | (28 - 35) | 316           | 678   | 27                  | (19 - 36) | 100           | 74    | 34                  | (24 - 43) | 159           | 107   |
| 2005            | 31           | (27 - 35) | 374           | 822   | 31                  | (23 - 40) | 118           | 95    | 36                  | (26 - 44) | 194           | 158   |
| 2006            | 36           | (32 - 40) | 424           | 1029  | 29                  | (19 - 41) | 133           | 99    | 37                  | (29 - 44) | 210           | 175   |
| 2007            | 34           | (30 - 38) | 470           | 1248  | 27                  | (19 - 37) | 147           | 135   | 34                  | (28 - 40) | 219           | 214   |
| 2008            | 38           | (34 - 42) | 493           | 1349  | 41                  | (29 - 52) | 154           | 122   | 35                  | (25 - 44) | 210           | 165   |
| 2009            | 36           | (33 - 40) | 539           | 1556  | 33                  | (23 - 44) | 168           | 158   | 30                  | (21 - 39) | 223           | 227   |
| 2010            | 38           | (34 - 42) | 559           | 1665  | 37                  | (28 - 48) | 174           | 175   | 31                  | (21 - 40) | 185           | 138   |
| 2011            | 35           | (31 - 39) | 611           | 1977  | 30                  | (20 - 40) | 190           | 208   | 31                  | (25 - 37) | 187           | 210   |
| 2012            | 37           | (32 - 41) | 619           | 1995  | 23                  | (16 - 33) | 193           | 159   | 33                  | (25 - 42) | 149           | 96    |
| 2013            | 33           | (30 - 37) | 657           | 2240  | 24                  | (16 - 32) | 205           | 255   | 29                  | (19 - 40) | 164           | 160   |
| 2014            | 31           | (27 - 34) | 678           | 2374  | 32                  | (24 - 40) | 212           | 273   | 23                  | (19 - 28) | 139           | 113   |
| 2015            | 27           | (24 - 30) | 718           | 2708  | 31                  | (21 - 44) | 224           | 239   | 24                  | (18 - 29) | 159           | 202   |

974 *Note:* MHSPs refers to the number of maternal half-sibling pairs identified.

975 **Figure 1:** Schematic of CKMR sensitivity tests, examined via individual-based simulation (see  
976 also Tables 1 and 2; Scenario 1 was model validation, and Scenario 5 involved real genetic data,  
977 so are not included here). Populations with distinct pedigrees were produced and sampled via an  
978 individual-based data-generating model (purple). Population parameters were individually varied  
979 for each of three scenarios. Each population was sampled in three ways, and each set of samples  
980 was used as input to two estimation models (green): one model was naïve to the added  
981 population dynamics of the DGM, and one model was adapted to account for them. The prior on  
982  $\lambda$  and the year of estimation was varied for Scenario 2; otherwise, simulation results that are  
983 highlighted in the text used the model settings highlighted in bold (narrow prior on  $\lambda$ , estimating  
984 abundance five years in the past).

985

986 **Figure 2:** Base CKMR model performance and kin pairs detected for three different sampling  
987 schemes at four different sampling intensities over 500 iterations. **a)** Relative bias of abundance  
988 estimates of adult females and males as a percentage of the truth (i.e. relative bias x 100). Bias  
989 was calculated from the median of each of 500 posterior distributions. **b)** CV on abundance  
990 estimates with log-scaled Y axis for visualization. **c)** Number of sex-specific half-sibling pairs  
991 detected by sampling scheme and sampling intensity. For each iteration, the number of half  
992 sibling pairs for each sex was calculated and averaged. **d)** Number of sex-specific parent-  
993 offspring pairs detected for the “sample all ages” sampling scheme.

994

995 **Figure 3:** Relative bias of CKMR abundance estimates for mature females ( $N_{\phi}$ ) when applied to  
996 populations experiencing variable degrees of population growth or decline. Plots are split by  
997 sampling scheme (column), population growth pattern (row facet) and the year of estimation  
998 (rows within population growth facet). Scenarios assessed had population growth as **a)** stable  
999 (+/-0% per year), **b)** slightly increasing (+1% per year), **c)** slightly declining (-1% per year), or  
1000 **d)** severely declining (-5-10% per year over the final 10 years). Three different models were fit  
1001 to 500 simulated populations for each scenario: a naïve model without a parameter for population  
1002 growth (red), an adapted model with population growth constrained to +/-5% per year (yellow),  
1003 and an adapted model with population growth more loosely constrained to +/- 20% per year  
1004 (blue). Plots were truncated at +/-100% for visualization because there were long tails of positive  
1005 bias for the 10 year past scenarios.

1006

1007 **Figure 4:** Relative bias of CKMR parameter estimates with intermittent breeding and aging  
1008 error. **a)** Relative bias of abundance estimates for females ( $N_f$ , top facet) and males ( $N_m$ , bottom  
1009 facet) in a simulated population with different ratios of biennial vs. annual female breeders. An  
1010 annual CKMR model that was naïve to intermittent breeding dynamics was examined (Eq. 3,  
1011 orange) as was a multiennial model that was adapted to account for these dynamics (Eq. 4, blue).  
1012 On the x-axis,  $1^*$  is the case with 10% of biennial breeders that breed off-cycle and 10% of on-  
1013 cycle females that fail to breed. **b)** Relative bias of abundance estimates for females (top facet)  
1014 and survival (bottom facet) when uncertainty was introduced to length-based age assignments. In  
1015 contrast to a, there was no intentional model misspecification in these simulations; rather, annual  
1016 models were fit to populations that bred annually (light blue), while multiennial models were fit

1017 to populations that bred biennially (dark blue), thereby isolating the effects of aging error on the  
1018 resulting bias.

1019

1020 **Figure 5:** Time series of CKMR parameter estimates for mature female lemon sharks at Bimini,  
1021 Bahamas using the full dataset (green; solid trendline), a dataset that was downsampled to 30%  
1022 of the sampling effort for each year of sampling (orange; dotted trendline), and a dataset that  
1023 included five years of samples for each instance of abundance estimation (purple; dashed  
1024 trendline). Points represent the median of the posterior distribution, and error bars reflect the  
1025 95% highest posterior density interval (HPDI). **a)** Estimates of annual female abundance. **b)**  
1026 Estimates of survival.

1027 **Figure 1**

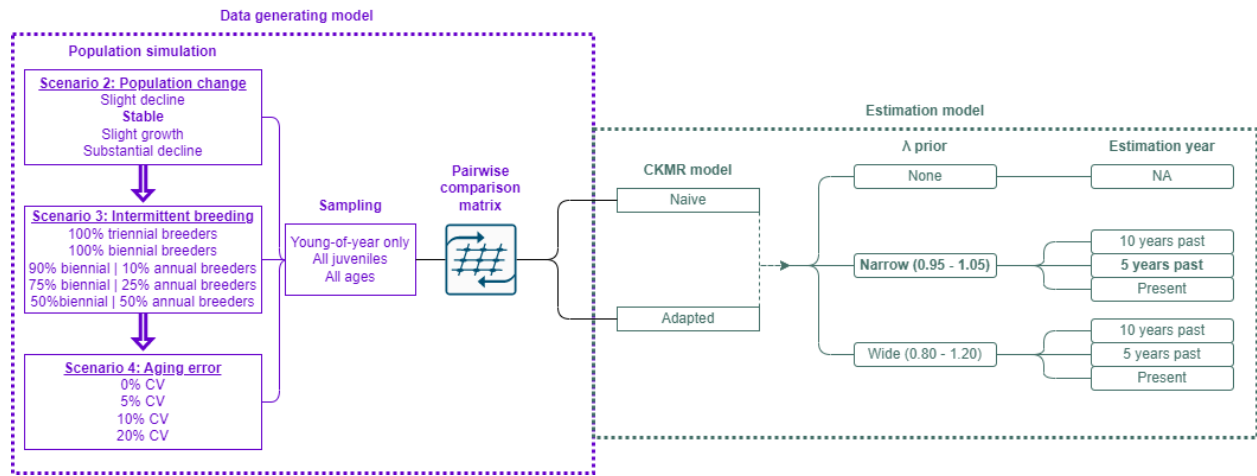

1028

1029

1030 **Figure 2**

1031

1032

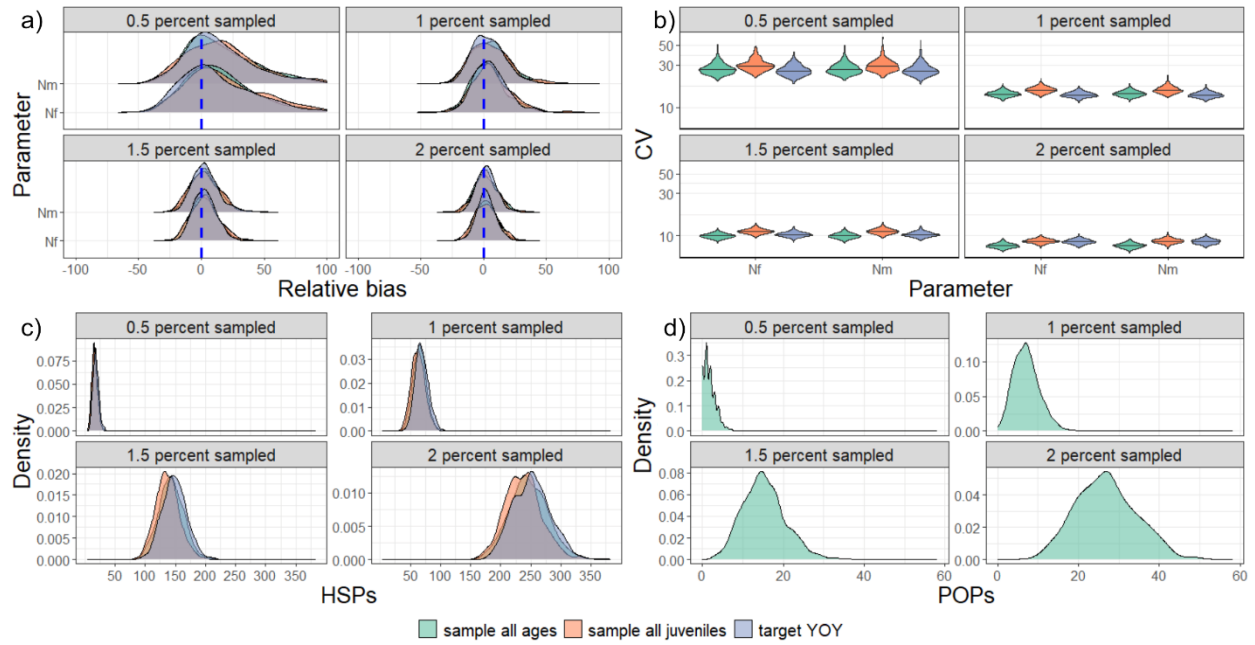

1033 **Figure 3**

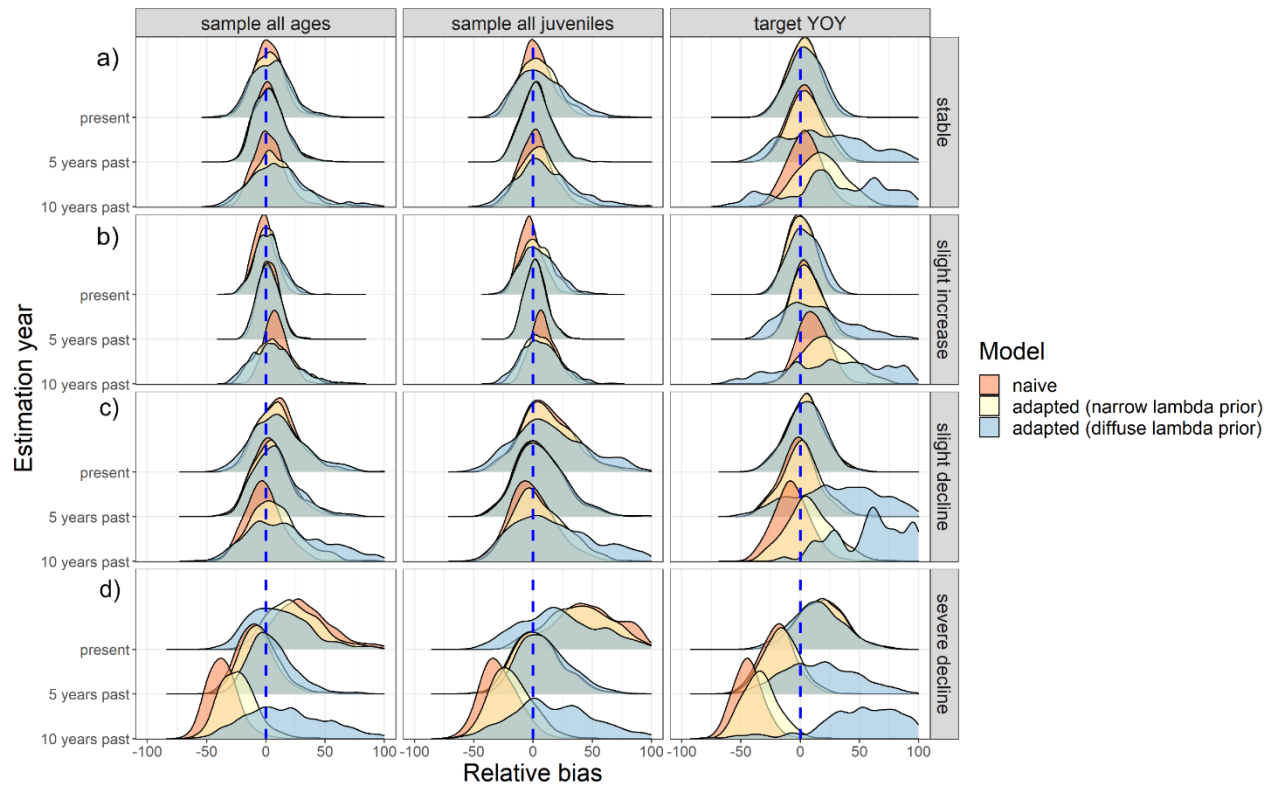

1034

1035

1036 **Figure 4**

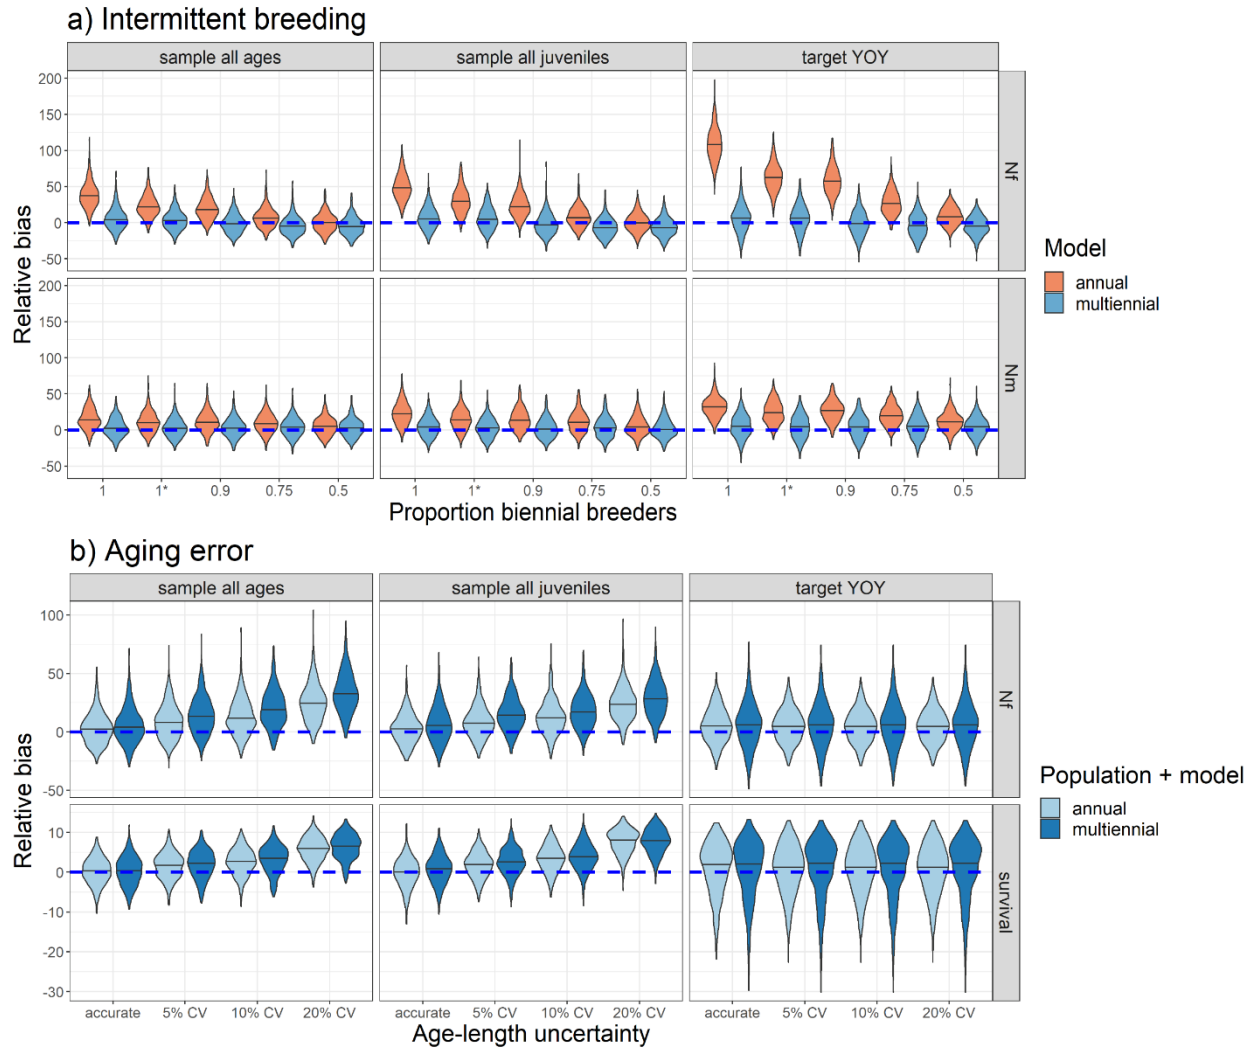

1037

1038

1039

1040

1041

1042

1043

1044

1045

1046

1047 **Figure 5**

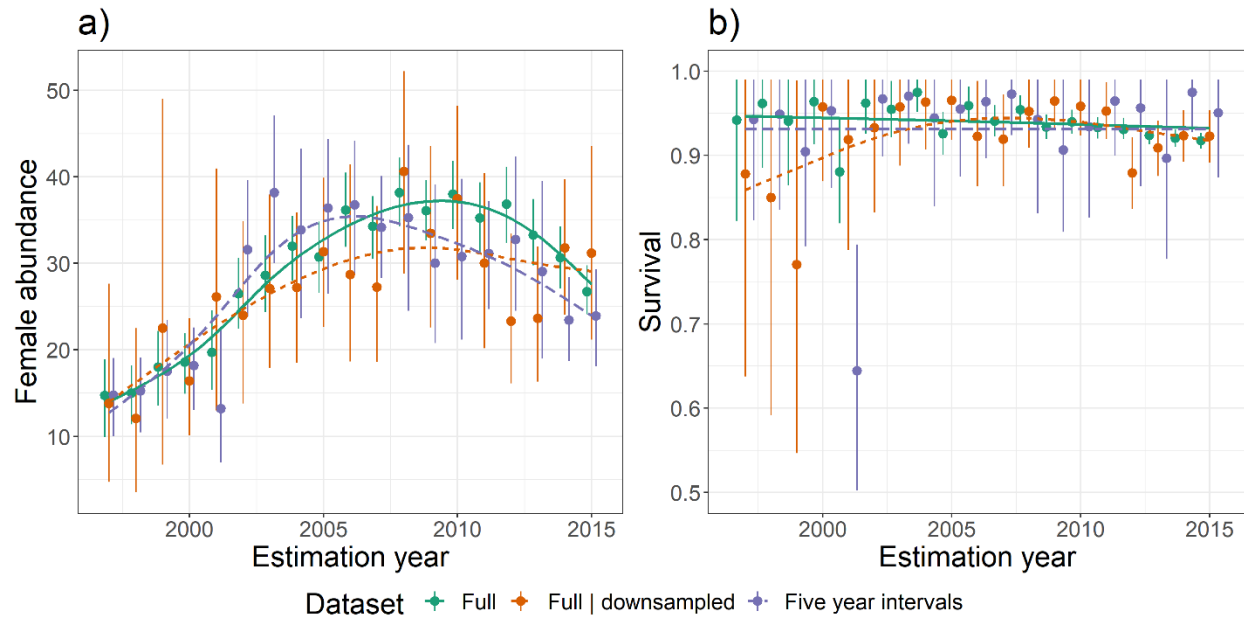

1048

1049
